# Supplementary material
Source: MDPI journal article supplement (https://www.mdpi.com/2304-6740/7/5/61)
Supplement: s1 [file s1]

# Supplementary Materials: Comparing the Acidity of $(R_3P)_2BH$ -Based Donor Groups in Iridium Pincer Complexes

Leon Maser, Christian Schneider, Lukas Alig and Robert Langer

## Content

|                                                            |     |
|------------------------------------------------------------|-----|
| Spectra.....                                               | S2  |
| X-Ray Crystallography .....                                | S8  |
| DFT Calculations .....                                     | S9  |
| Cartesian coordinates of all DFT-optimized geometries..... | S9  |
| References.....                                            | S50 |

## Spectra

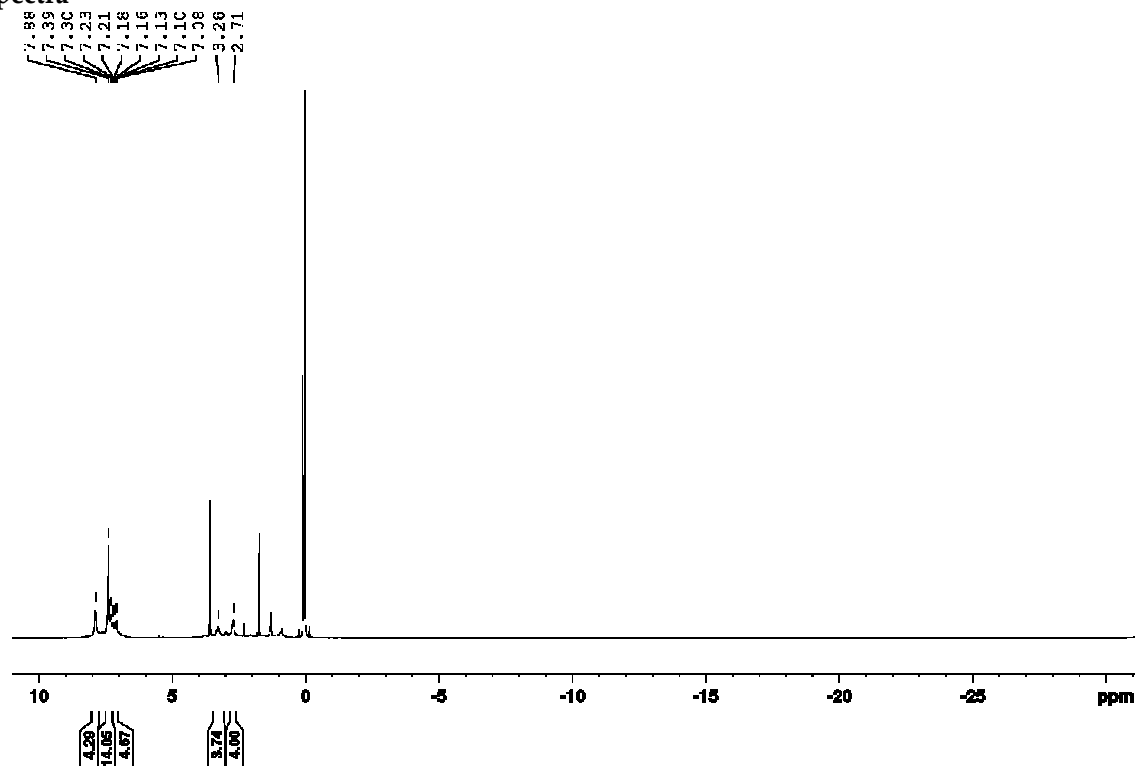

Figure S1. <sup>1</sup>H NMR spectrum of  $[(\kappa^3P,N,P\text{-}^i\text{PhPNH}^iP)\text{Ir}(\text{CO})]\text{Cl}$  (**2a**) in  $\text{THF-}d_8$  after addition of the first equivalent of LiHMDS.

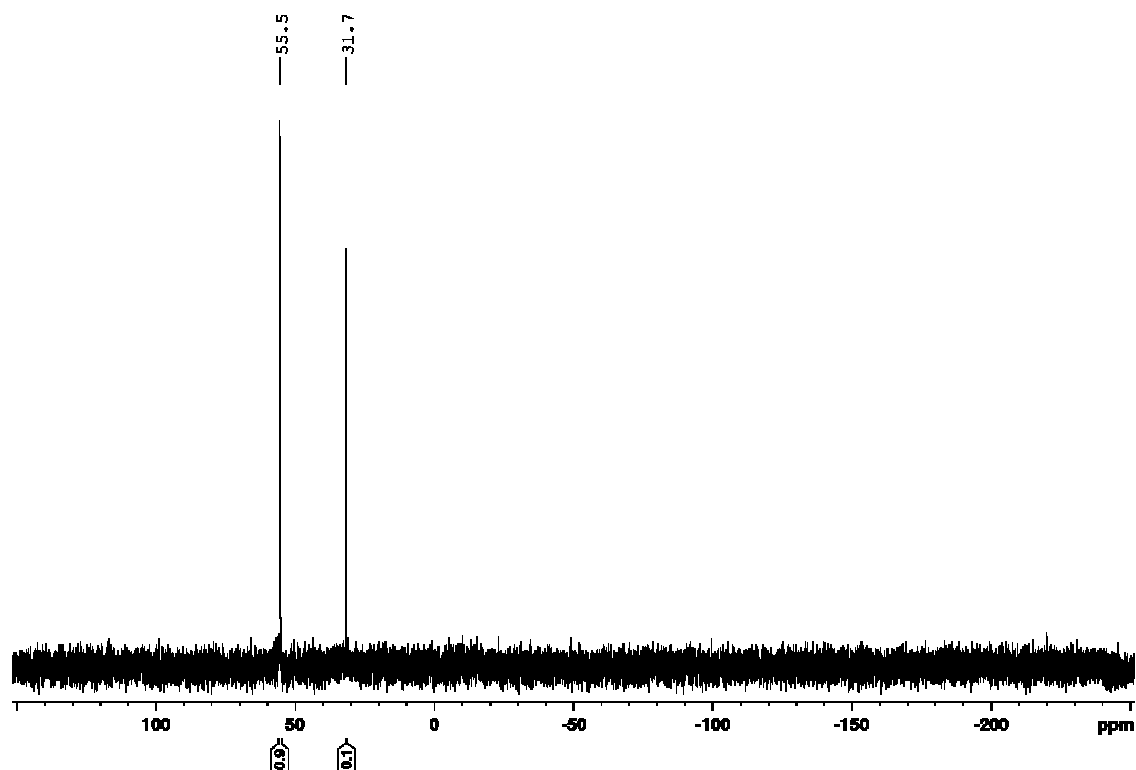

Figure S2. <sup>31</sup>P{<sup>1</sup>H} NMR spectrum of  $[(\kappa^3P,N,P\text{-}^i\text{PhPNH}^iP)\text{Ir}(\text{CO})]\text{Cl}$  (**2a**) in  $\text{THF-}d_8$  after addition of the first equivalent of LiHMDS.

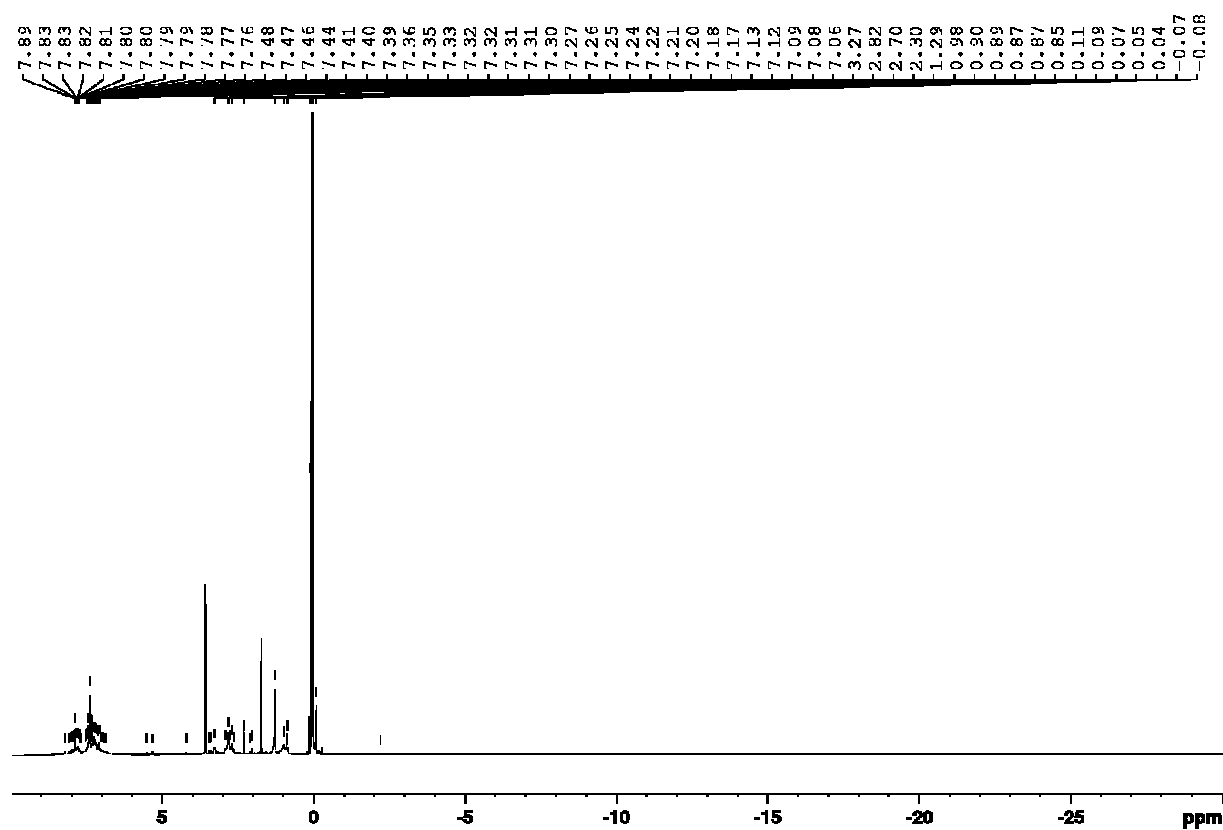

**Figure S3.**  $^1\text{H}$  NMR spectrum of  $[(\kappa^3P,N,P\text{-PhPNHP})\text{Ir}(\text{CO})]\text{Cl}$  (2a) in  $\text{THF-}d_8$  after addition of the second equivalent of LiHMDS.

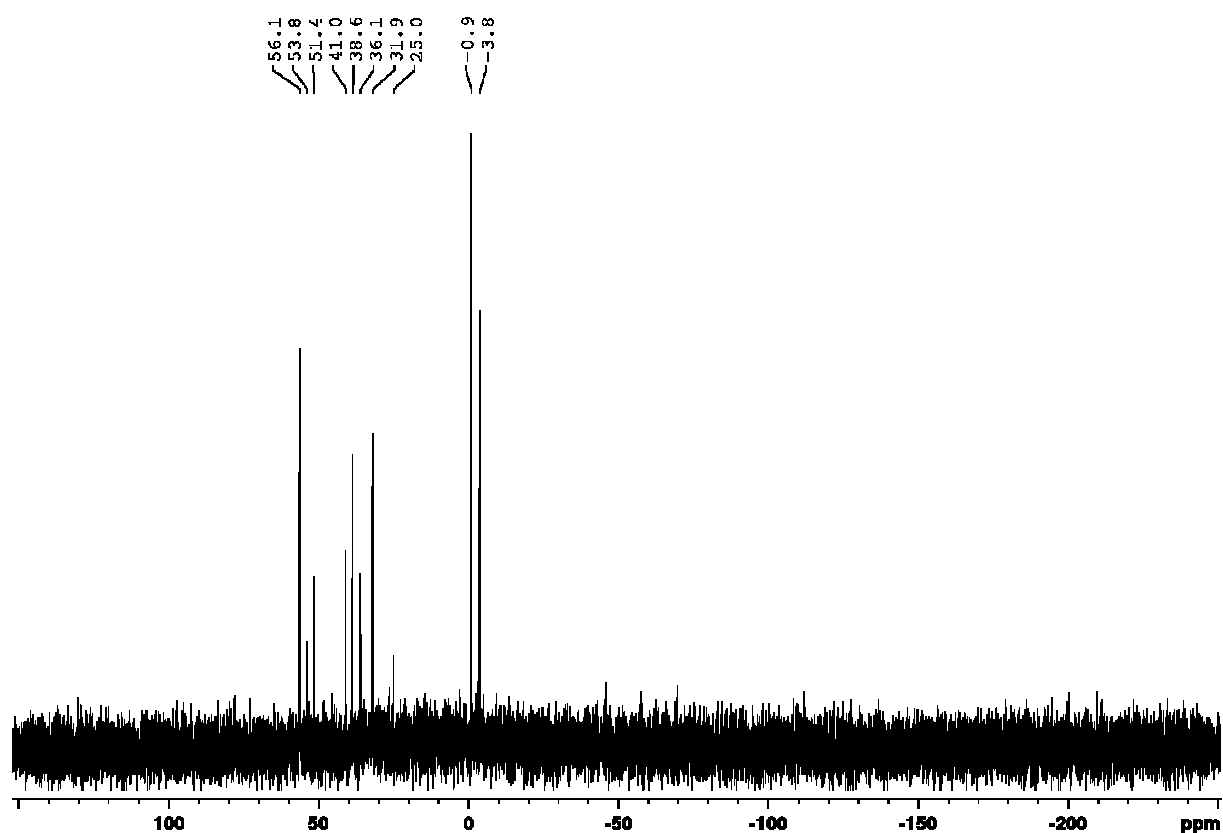

**Figure S4.**  $^{31}\text{P}\{^1\text{H}\}$  NMR spectrum of  $[(\kappa^3P,N,P\text{-PhPNHP})\text{Ir}(\text{CO})]\text{Cl}$  (2a) in  $\text{THF-}d_8$  after addition of the second equivalent of LiHMDS.

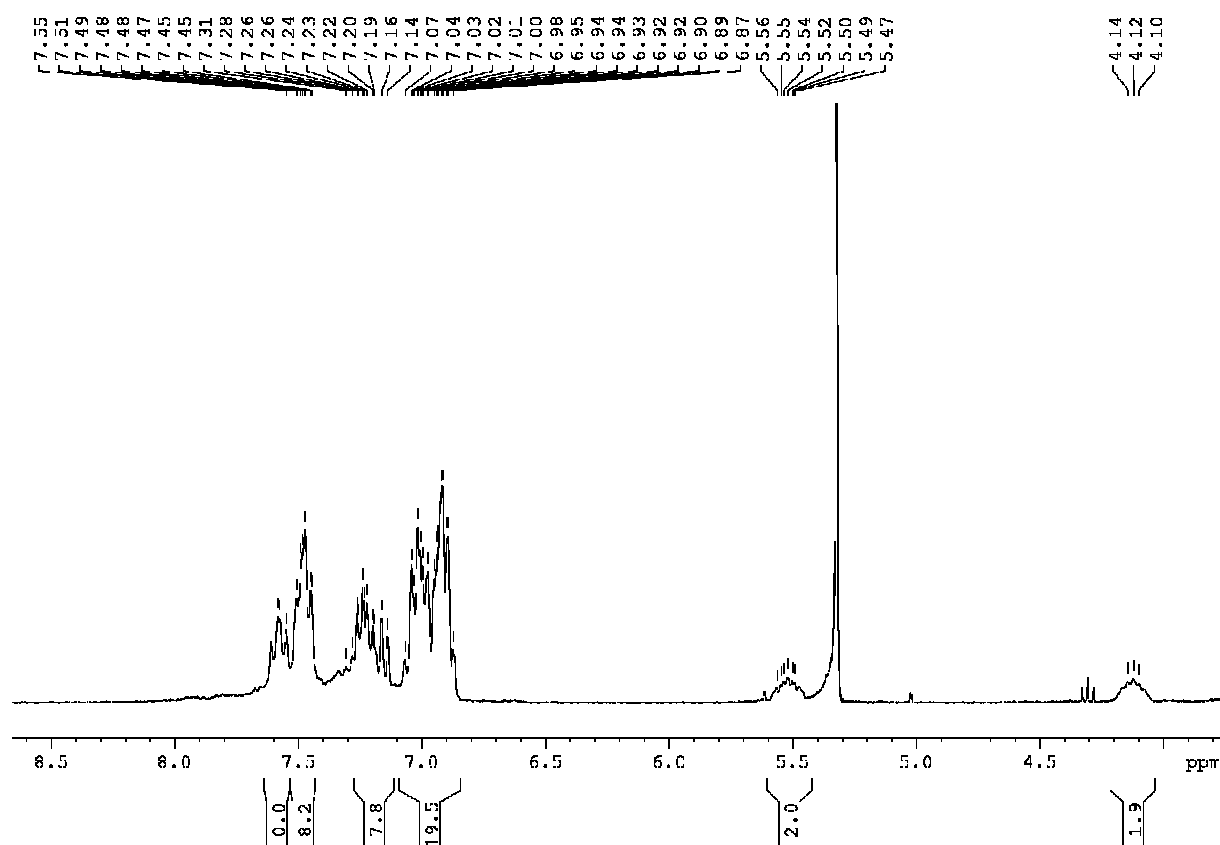

Figure S5.  $^1\text{H}$  NMR spectrum of  $[(\kappa^3P,C,P\text{-HB(dppm)}_2)\text{Ir(CO)}_2]\text{Br}$  (**5c**) in  $\text{CD}_2\text{Cl}_2$ .

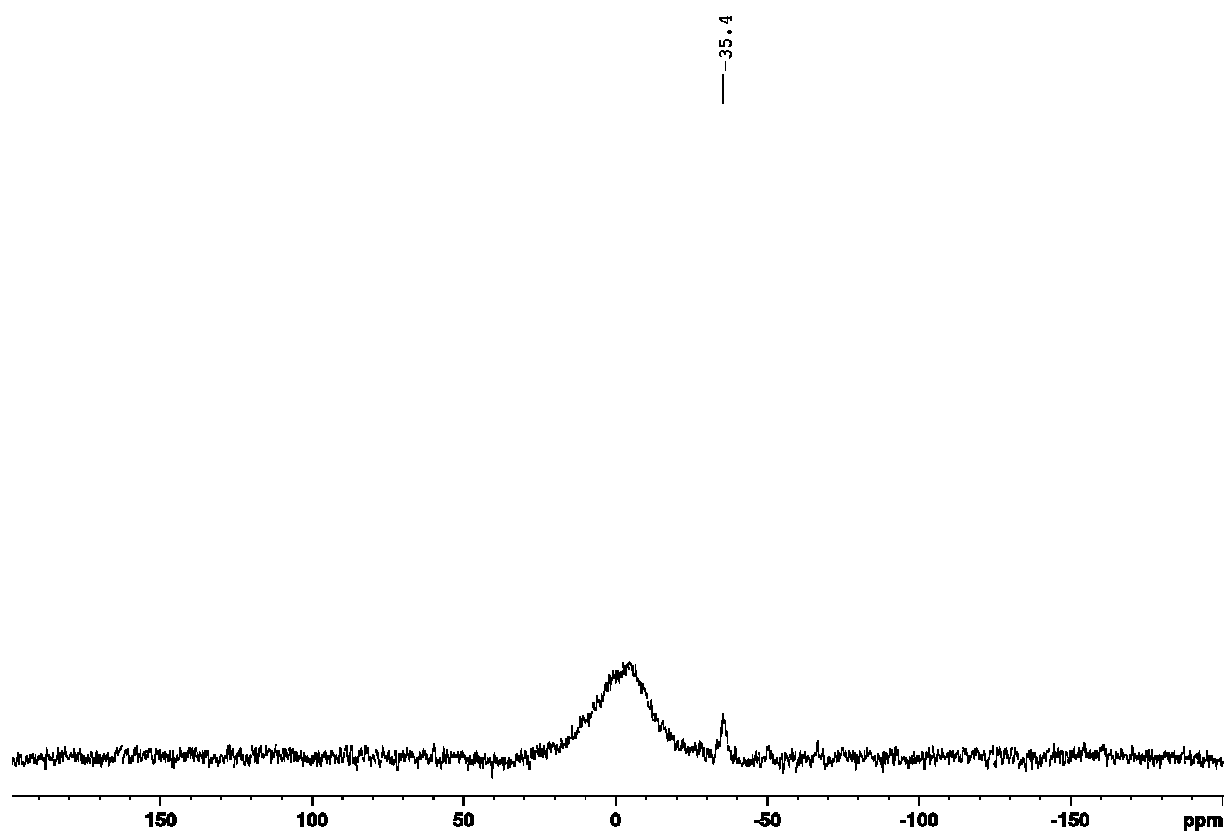

Figure S6.  $^{13}\text{B}\{^1\text{H}\}$  NMR spectrum of  $[(\kappa^3P,C,P\text{-HB(dppm)}_2)\text{Ir(CO)}_2]\text{Br}$  (**5c**) with reduced glass peak in  $\text{CD}_2\text{Cl}_2$ .

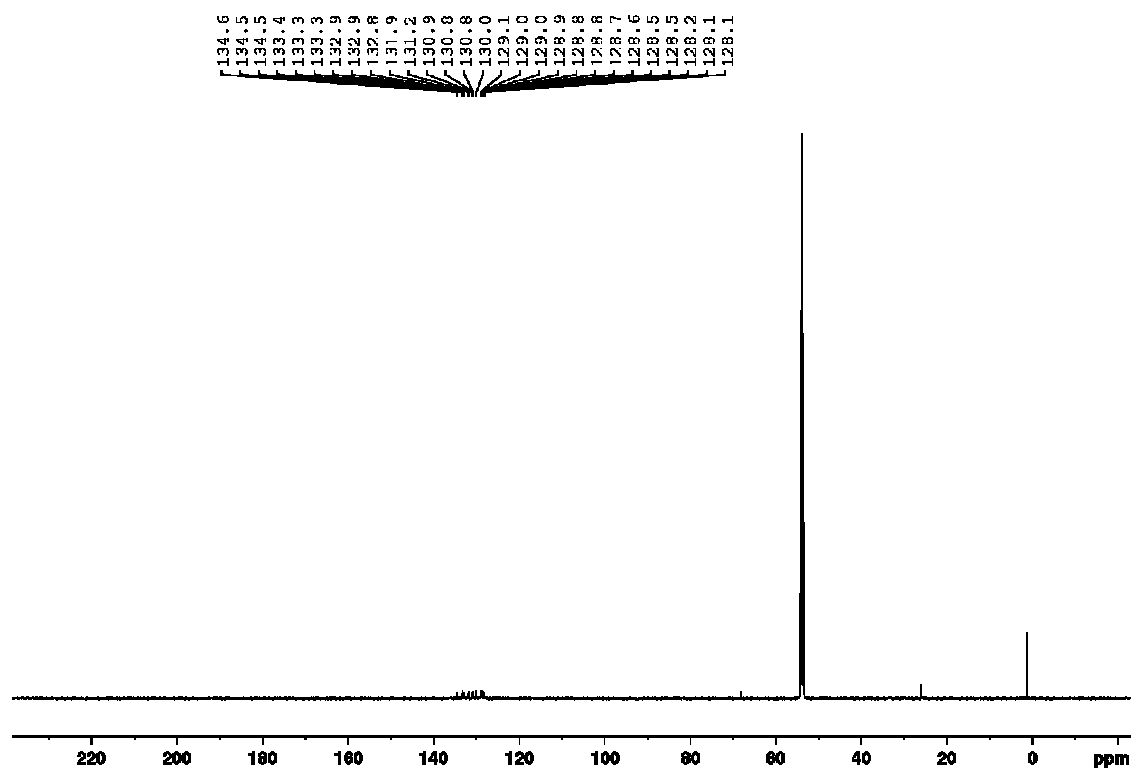

Figure S7.  $^{13}\text{C}\{^1\text{H}\}$  NMR spectrum of  $[\{\kappa^3P,C,P\text{-HB(dppm)}_2\}\text{Ir(CO)}_2]\text{Br}$  (5c) in  $\text{CD}_2\text{Cl}_2$ .

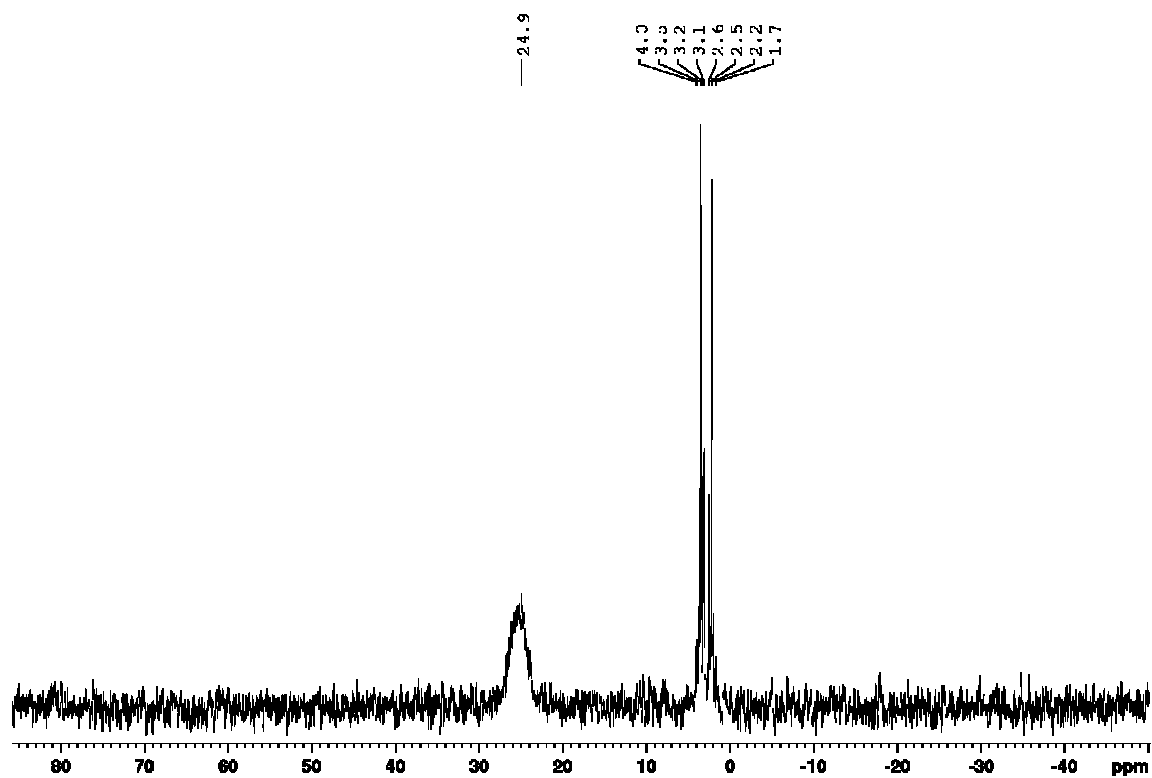

Figure S8.  $^{31}\text{P}\{^1\text{H}\}$  NMR spectrum of  $[\{\kappa^3P,C,P\text{-HB(dppm)}_2\}\text{Ir(CO)}_2]\text{Br}$  (5c) in  $\text{CD}_2\text{Cl}_2$ .

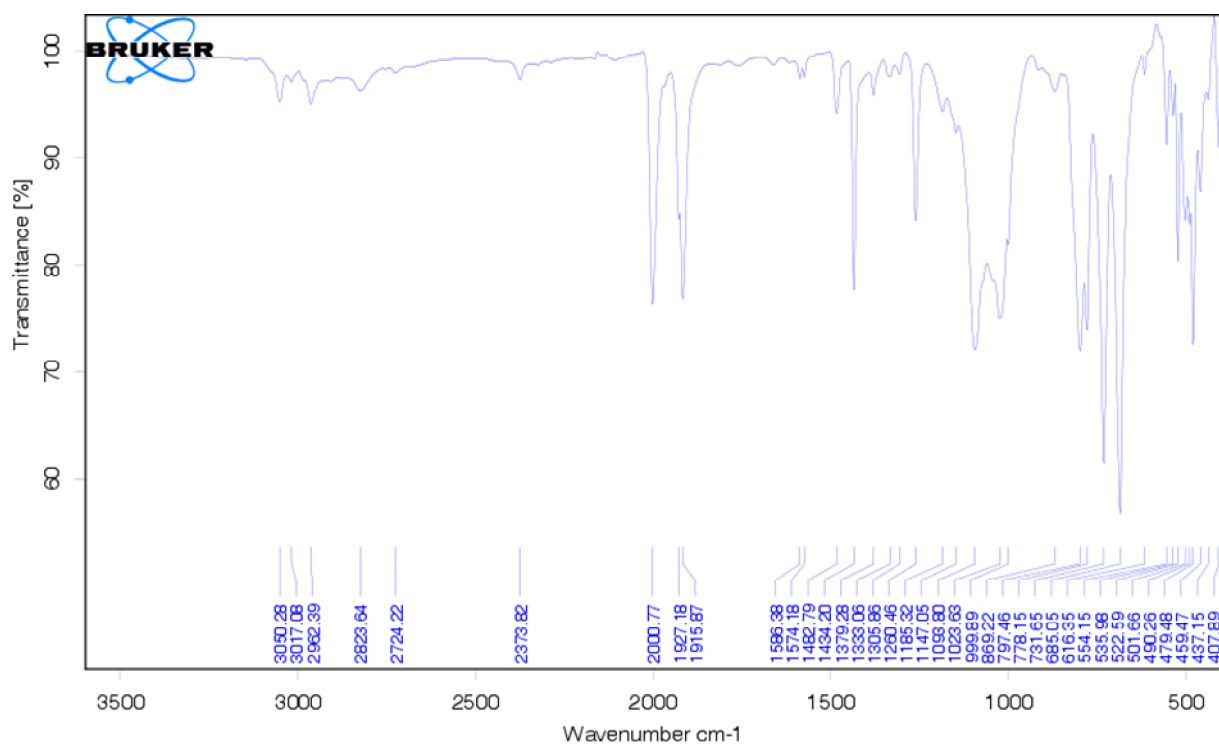

Figure S9. FT-IR spectrum of  $[\{\kappa^3P,C,P\text{-HB(dppm)}_2\}\text{Ir(CO)}_2]\text{Br}$  (5c).

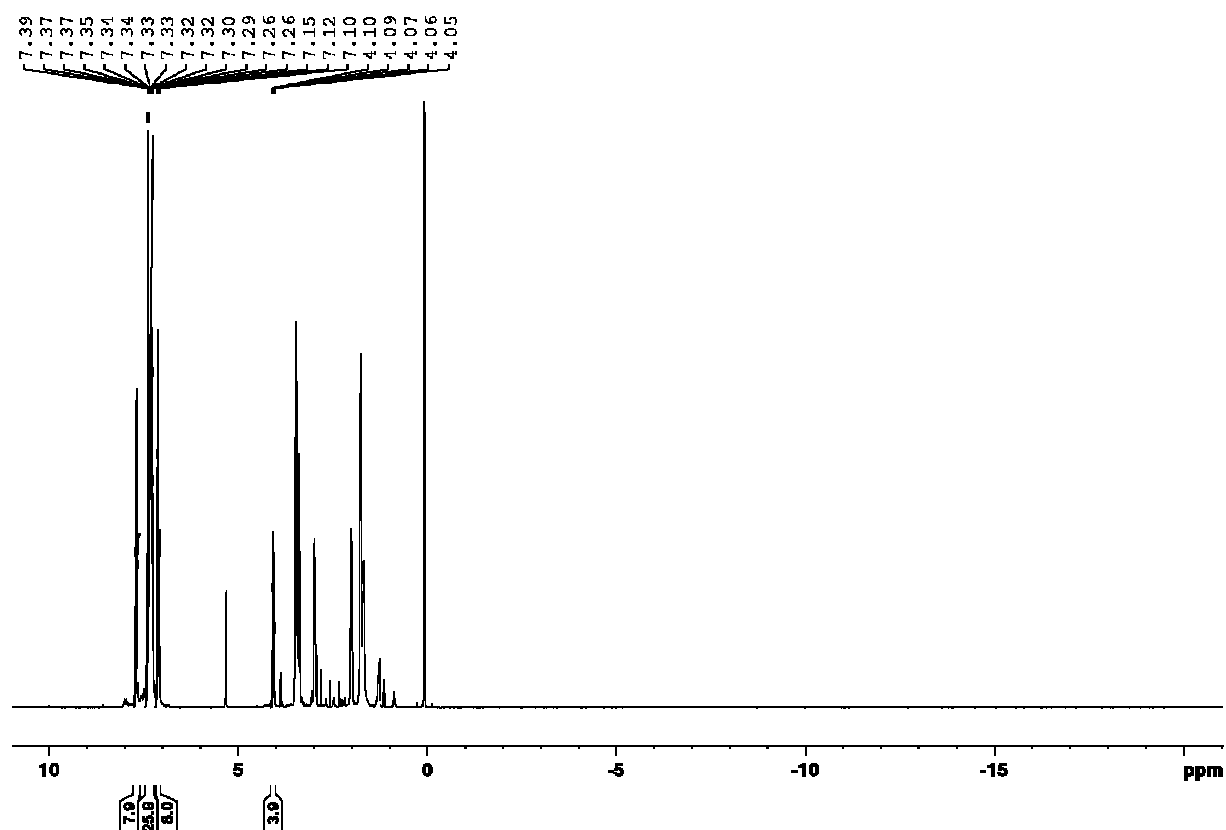

Figure S10.  $^1\text{H}$  NMR spectrum of  $[\{\kappa^3P,C,P\text{-C(dppm)}_2\}\text{Ir(CO)}]\text{Cl}$  (4b) in  $\text{CD}_2\text{Cl}_2$ .

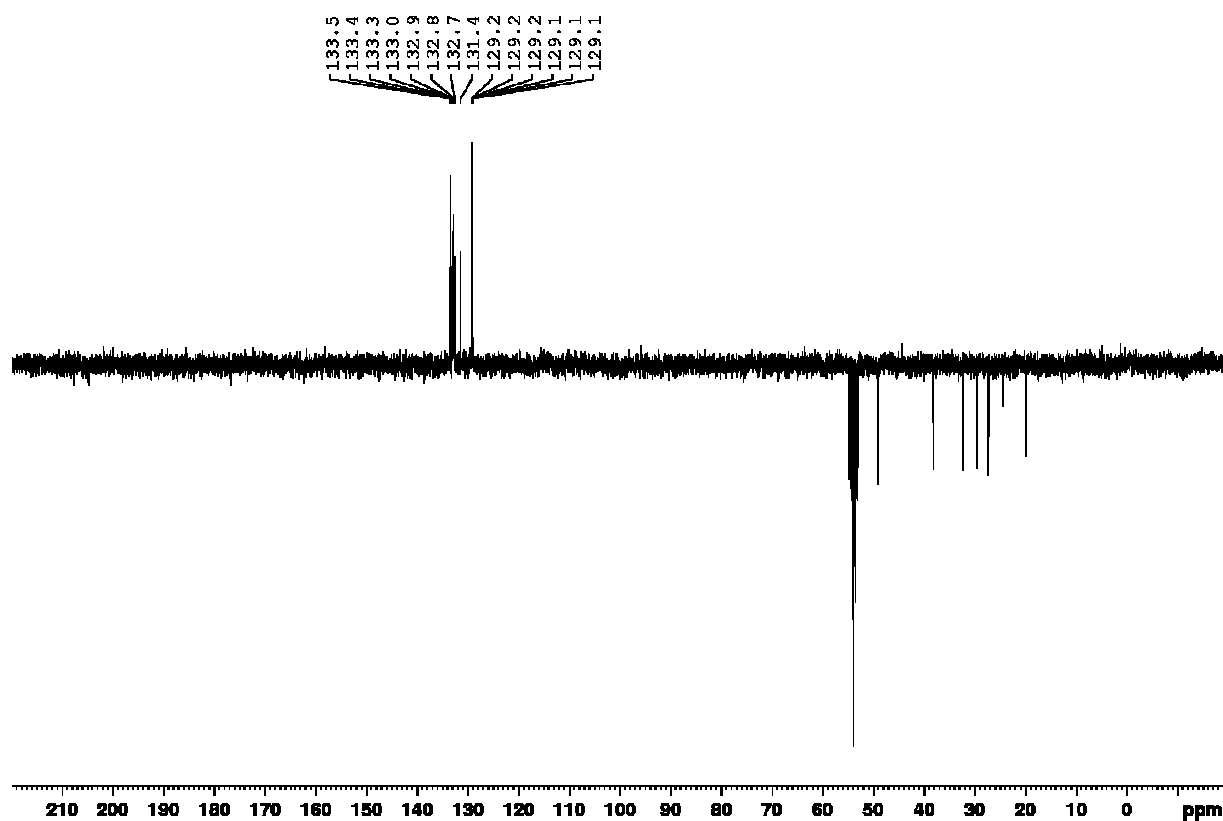

Figure S11.  $^{13}\text{C}$  APT NMR spectrum of  $[\{\kappa^3P,C,P\text{-C(dppm)}_2\}\text{Ir(CO)}]\text{Cl}$  (**4b**) in  $\text{CD}_2\text{Cl}_2$ .

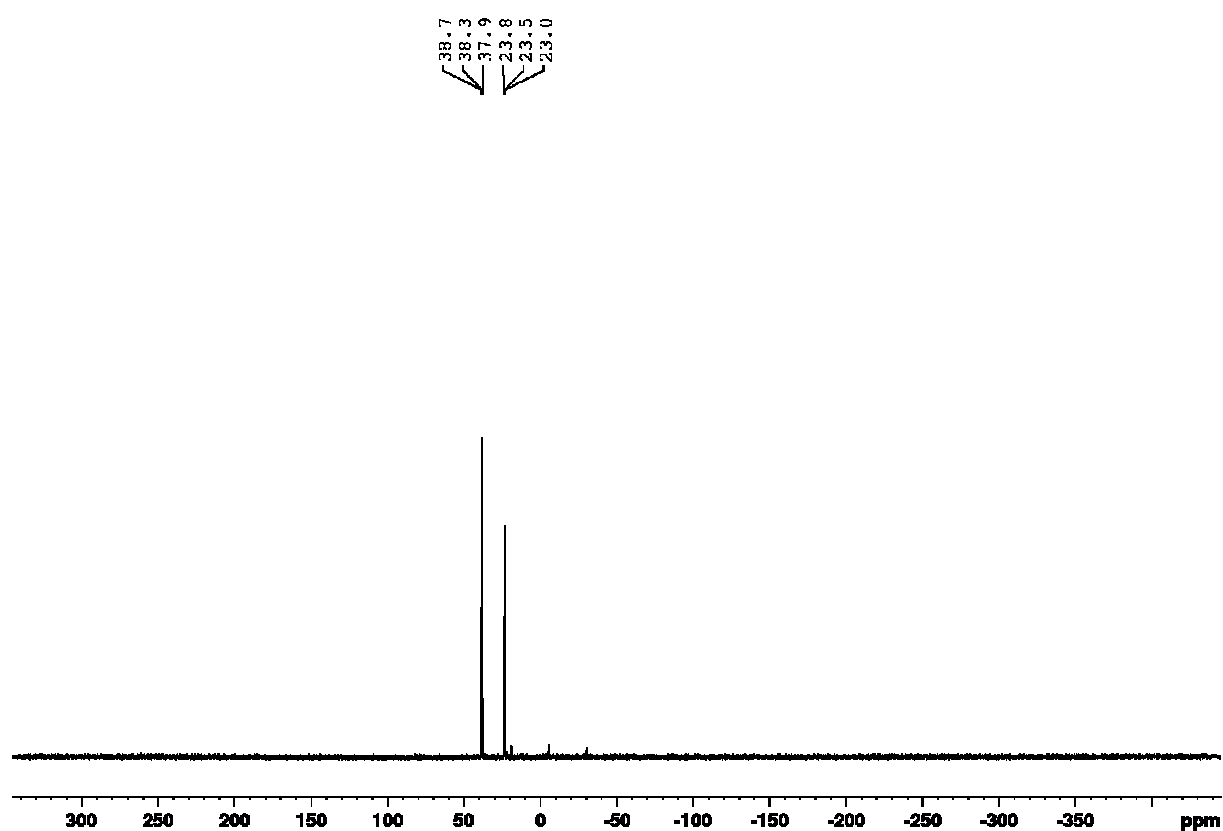

Figure S12.  $^{31}\text{P}\{^1\text{H}\}$  NMR spectrum of  $[\{\kappa^3P,C,P\text{-C(dppm)}_2\}\text{Ir(CO)}]\text{Cl}$  (**4b**) in  $\text{CD}_2\text{Cl}_2$ .

**X-Ray Crystallography**

The single crystal X-ray diffraction data for the structural analysis were collected using graphite-monochromated Mo-K $\alpha$ -radiation ( $\lambda_{\text{MoK}\alpha} = 0.71073$ ) the pixel detector system Bruker Quest D8. The structures were solved with the Olex2 software by direct methods with SHELXT and refined against  $F^2$  by full-matrix-least-square techniques using SHELXL.<sup>[8–11]</sup> Crystallographic data for **5c** was deposited at Cambridge Crystallographic Data Centre (CCDC 1906827) and can be obtained free of charge via [www.ccdc.cam.ac.uk/](http://www.ccdc.cam.ac.uk/).

**Table S1.** Crystallographic data of complex **5c**.

| Complex                                    | 5c                                                                                                  |
|--------------------------------------------|-----------------------------------------------------------------------------------------------------|
| Formula                                    | C <sub>52</sub> H <sub>45</sub> BIrO <sub>2</sub> P <sub>4</sub> Br·C <sub>4</sub> H <sub>8</sub> O |
| M / g·mol <sup>−1</sup>                    | 1180.79                                                                                             |
| T/K                                        | 110(2)                                                                                              |
| Crystal System                             | monoclinic                                                                                          |
| Space Group                                | C2/c                                                                                                |
| a / Å                                      | 40.6382(15)                                                                                         |
| b / Å                                      | 12.2295(5)                                                                                          |
| c / Å                                      | 24.2274(9)                                                                                          |
| $\alpha$ / °                               | 90                                                                                                  |
| $\beta$ / °                                | 125,090(1)                                                                                          |
| $\gamma$ / °                               | 90                                                                                                  |
| V / Å <sup>3</sup>                         | 9852.3(7)                                                                                           |
| Z                                          | 8                                                                                                   |
| $\rho_{\text{calc.}}$ / g·cm <sup>−3</sup> | 1.557                                                                                               |
| $\mu$ / mm <sup>−1</sup>                   | 3.696                                                                                               |
| F(000)                                     | 4624                                                                                                |
| $\Theta_{\text{min}}$ / °                  | 2.220                                                                                               |
| $\Theta_{\text{max}}$ / °                  | 31.282                                                                                              |
| Measured Refl.                             | 142905                                                                                              |
| Independent Refl.                          | 14758 ( $R_{\text{int}} = 0.0304$ )                                                                 |
| Ind. Refl. ( $I > 2 \sigma(I)$ )           | 13053                                                                                               |
| Parameters/Restraints                      | 599/0                                                                                               |
| $R_1$                                      | 0.0277                                                                                              |
| $R_1$ (all data)                           | 0.0354                                                                                              |
| $wR_2$                                     | 0.0695                                                                                              |
| $wR_2$ (all data)                          | 0.0728                                                                                              |
| Goof                                       | 1.023                                                                                               |
| Max. peak + hole / e·Å <sup>−3</sup>       | 0.963/−2.678                                                                                        |
| CCDC                                       | 1906827                                                                                             |



**DFT Calculations**

DFT calculations were performed with Grimme's B97D functional including dispersion<sup>[2]</sup> and the def2TZVPP basis set after a pre-optimization with the def2SVP basis set<sup>[3,4]</sup> in Gaussian16.<sup>[5,10]</sup> Crystal structures were used as starting models, where possible. After optimization, a frequency calculation was performed to ascertain that a ground state was found (no imaginary modes). The proton affinities (PA's) were calculated as the difference in Gibbs energy (E) between a protonated complex and its deprotonated counterpart:

$$PA = E(\text{complex}) - E(\text{complexH}^+)$$

Not included in the calculations were counter ions and implicit or explicit solvation effects.

**Cartesian coordinates of all DFT-optimized geometries**  
**2a**

| Atomic center | X         | Y         | Z         |
|---------------|-----------|-----------|-----------|
| C             | 2.468401  | 0.037735  | 2.303634  |
| C             | 1.252147  | 0.779264  | 2.860264  |
| N             | 0.001002  | 0.113688  | 2.364581  |
| Ir            | 0.000446  | -0.216336 | 0.175704  |
| C             | -1.252391 | 0.772813  | 2.863327  |
| C             | -2.466255 | 0.028582  | 2.305156  |
| C             | -0.000112 | -0.589134 | -1.622508 |
| O             | -0.000668 | -0.843453 | -2.753197 |
| H             | 0.003912  | -0.835160 | 2.748519  |
| P             | 2.294569  | -0.047588 | 0.442908  |
| C             | 3.337804  | -1.425166 | -0.109891 |
| C             | 4.681199  | -1.270876 | -0.483591 |
| C             | 5.422915  | -2.385269 | -0.882340 |
| C             | 4.830531  | -3.651610 | -0.909168 |
| C             | 3.488352  | -3.806530 | -0.546563 |
| C             | 2.739898  | -2.696147 | -0.154548 |
| C             | 3.011102  | 1.509476  | -0.162325 |
| C             | 2.352439  | 2.194722  | -1.195991 |
| C             | 2.880134  | 3.386998  | -1.695509 |
| C             | 4.063338  | 3.907087  | -1.163187 |
| C             | 4.721273  | 3.233501  | -0.128598 |
| C             | 4.198701  | 2.039504  | 0.371092  |

---

|   |           |           |           |
|---|-----------|-----------|-----------|
| P | -2.293417 | -0.050364 | 0.444280  |
| C | -3.336744 | -1.425990 | -0.112932 |
| C | -4.681756 | -1.269944 | -0.480145 |
| C | -5.424720 | -2.382163 | -0.882463 |
| C | -4.831803 | -3.648022 | -0.919451 |
| C | -3.488071 | -3.804572 | -0.563324 |
| C | -2.738407 | -2.696305 | -0.167534 |
| C | -3.011007 | 1.507772  | -0.157107 |
| C | -4.193844 | 2.041059  | 0.383448  |
| C | -4.717831 | 3.234941  | -0.115148 |
| C | -4.066352 | 3.904908  | -1.156093 |
| C | -2.888031 | 3.381348  | -1.695866 |
| C | -2.358704 | 2.189496  | -1.197172 |
| H | 2.495273  | -0.994308 | 2.674996  |
| H | 3.397841  | 0.530144  | 2.604609  |
| H | 1.254009  | 0.786505  | 3.958095  |
| H | 1.226420  | 1.813000  | 2.501470  |
| H | -1.253339 | 0.776353  | 3.961166  |
| H | -1.231067 | 1.807918  | 2.508241  |
| H | -2.488731 | -1.005038 | 2.672416  |
| H | -3.397404 | 0.515902  | 2.609068  |
| H | 5.141526  | -0.287279 | -0.480654 |
| H | 6.461562  | -2.263022 | -1.177921 |
| H | 5.410641  | -4.514962 | -1.224222 |
| H | 3.022732  | -4.787881 | -0.583854 |
| H | 1.685362  | -2.799508 | 0.096667  |
| H | 1.425091  | 1.794038  | -1.594941 |
| H | 2.366195  | 3.910813  | -2.497141 |
| H | 4.471898  | 4.836686  | -1.550564 |
| H | 5.640581  | 3.636691  | 0.287880  |
| H | 4.723241  | 1.523084  | 1.170935  |
| H | -5.142256 | -0.286432 | -0.469321 |
| H | -6.464640 | -2.258643 | -1.172996 |

---

|   |           |           |           |
|---|-----------|-----------|-----------|
| H | -5.412808 | -4.509728 | -1.237356 |
| H | -3.022271 | -4.785507 | -0.608465 |
| H | -1.682942 | -2.800541 | 0.079311  |
| H | -4.713786 | 1.527458  | 1.188051  |
| H | -5.633358 | 3.640736  | 0.307092  |
| H | -4.476073 | 4.834312  | -1.542701 |
| H | -2.379092 | 3.902217  | -2.502594 |
| H | -1.435058 | 1.786263  | -1.602072 |

**1a**

| Atomic center | X         | Y         | Z         |
|---------------|-----------|-----------|-----------|
| C             | -2.469296 | 0.059318  | 2.319369  |
| C             | -1.256470 | -0.662388 | 2.905861  |
| N             | -0.002247 | -0.027873 | 2.382531  |
| Ir            | -0.003139 | 0.062266  | 0.161027  |
| C             | 1.240848  | -0.675936 | 2.915386  |
| C             | 2.471388  | 0.008612  | 2.317724  |
| C             | 0.010061  | 0.241681  | -1.683770 |
| H             | -0.027542 | 1.641908  | 0.319045  |
| Cl            | 0.042031  | -2.433412 | 0.254304  |
| O             | 0.027843  | 0.368886  | -2.828613 |
| H             | 0.003027  | 0.941256  | 2.703126  |
| P             | -2.344262 | 0.100207  | 0.454922  |
| C             | -3.168466 | 1.638820  | -0.053120 |
| C             | -4.300666 | 1.629596  | -0.880971 |
| C             | -4.890990 | 2.836543  | -1.267716 |
| C             | -4.361794 | 4.051756  | -0.828193 |
| C             | -3.230181 | 4.064646  | -0.003717 |
| C             | -2.631296 | 2.864636  | 0.375225  |
| C             | -3.324559 | -1.267948 | -0.200233 |
| C             | -2.871544 | -1.955626 | -1.335076 |
| C             | -3.655424 | -2.964721 | -1.896365 |
| C             | -4.887644 | -3.295218 | -1.325786 |

---

|   |           |           |           |
|---|-----------|-----------|-----------|
| C | -5.343529 | -2.611415 | -0.193587 |
| C | -4.567658 | -1.596292 | 0.366881  |
| P | 2.335177  | 0.091994  | 0.456391  |
| C | 3.226714  | 1.585929  | -0.054640 |
| C | 4.621402  | 1.644008  | 0.121111  |
| C | 5.322692  | 2.791718  | -0.246263 |
| C | 4.641960  | 3.881855  | -0.801463 |
| C | 3.258803  | 3.822773  | -0.988255 |
| C | 2.549459  | 2.677997  | -0.614514 |
| C | 3.268776  | -1.295867 | -0.223264 |
| C | 3.506735  | -2.458313 | 0.523185  |
| C | 4.169182  | -3.538288 | -0.062347 |
| C | 4.582729  | -3.467555 | -1.395223 |
| C | 4.335961  | -2.313075 | -2.145990 |
| C | 3.680040  | -1.228612 | -1.564676 |
| H | -2.505547 | 1.102389  | 2.656956  |
| H | -3.397210 | -0.427535 | 2.632858  |
| H | -1.257492 | -0.611116 | 4.002132  |
| H | -1.226802 | -1.707621 | 2.587599  |
| H | 1.242762  | -0.605061 | 4.010538  |
| H | 1.186415  | -1.725071 | 2.616464  |
| H | 2.545575  | 1.046539  | 2.664499  |
| H | 3.389139  | -0.510313 | 2.611655  |
| H | -4.718845 | 0.688258  | -1.223599 |
| H | -5.765570 | 2.823058  | -1.912519 |
| H | -4.824369 | 4.987781  | -1.129542 |
| H | -2.812199 | 5.008946  | 0.335175  |
| H | -1.733945 | 2.880977  | 0.989889  |
| H | -1.901228 | -1.724105 | -1.758960 |
| H | -3.296570 | -3.499688 | -2.771190 |
| H | -5.492438 | -4.086958 | -1.759993 |
| H | -6.302471 | -2.865136 | 0.250128  |
| H | -4.942218 | -1.056551 | 1.232956  |

---

|   |          |           |           |
|---|----------|-----------|-----------|
| H | 5.157079 | 0.789981  | 0.528317  |
| H | 6.399716 | 2.833466  | -0.107763 |
| H | 5.192264 | 4.772128  | -1.094240 |
| H | 2.730984 | 4.663515  | -1.430480 |
| H | 1.475551 | 2.628676  | -0.762627 |
| H | 3.170896 | -2.533215 | 1.552565  |
| H | 4.354253 | -4.436370 | 0.520533  |
| H | 5.095235 | -4.311174 | -1.849719 |
| H | 4.656769 | -2.256048 | -3.182603 |
| H | 3.497835 | -0.330228 | -2.149389 |

**3c**

| Atomic center | X         | Y         | Z         |
|---------------|-----------|-----------|-----------|
| Ir            | -0.965866 | 1.107124  | -0.147826 |
| H             | -0.850549 | 0.798465  | 1.382446  |
| P             | -2.556850 | -0.596921 | -0.298809 |
| Cl            | -0.991659 | 1.407128  | -2.739964 |
| P             | 1.018600  | 2.276305  | 0.012485  |
| B             | 0.573522  | -0.501111 | -0.241563 |
| C             | -2.178355 | 2.565931  | 0.181128  |
| C             | -1.765449 | -2.264448 | -0.516589 |
| C             | -3.782769 | -0.501627 | -1.651396 |
| C             | -3.592732 | -0.865309 | 1.197665  |
| C             | 0.967537  | 4.077576  | -0.349646 |
| C             | 1.821427  | 2.174255  | 1.646434  |
| C             | 2.227909  | 1.610423  | -1.218740 |
| P             | -0.086009 | -2.109868 | 0.262603  |
| P             | 2.223386  | -0.215901 | -0.941173 |
| O             | -2.853508 | 3.454135  | 0.500146  |
| H             | -2.395782 | -3.065741 | -0.115103 |
| H             | -1.590771 | -2.420526 | -1.585970 |
| C             | -4.256062 | 0.758634  | -2.039857 |
| C             | -4.279962 | -1.649781 | -2.284543 |
| C             | -3.378292 | -0.118823 | 2.361286  |

---

|   |           |           |           |
|---|-----------|-----------|-----------|
| C | -4.591240 | -1.853261 | 1.192737  |
| C | 1.750250  | 5.007180  | 0.353534  |
| C | 0.103768  | 4.524526  | -1.362589 |
| C | 3.215512  | 2.135549  | 1.801879  |
| C | 1.010955  | 2.200730  | 2.794016  |
| H | 3.221294  | 2.065569  | -1.152314 |
| H | 1.786399  | 1.817257  | -2.199963 |
| C | 0.858714  | -3.597489 | -0.187970 |
| C | -0.502456 | -2.265458 | 2.053737  |
| C | 2.681472  | -0.975682 | -2.564100 |
| C | 3.715836  | -0.561166 | 0.087081  |
| H | -3.837720 | 1.650888  | -1.588164 |
| C | -5.231202 | 0.865413  | -3.031906 |
| H | -3.906535 | -2.632173 | -2.007721 |
| C | -5.251173 | -1.541103 | -3.282797 |
| H | -2.612364 | 0.648507  | 2.366972  |
| C | -4.134237 | -0.369069 | 3.509587  |
| H | -4.787109 | -2.421832 | 0.287142  |
| C | -5.346517 | -2.102373 | 2.338412  |
| C | 1.669732  | 6.368187  | 0.045534  |
| H | 2.410827  | 4.673234  | 1.148784  |
| H | -0.506139 | 3.805721  | -1.904880 |
| C | 0.034439  | 5.884129  | -1.670885 |
| H | 3.864208  | 2.121139  | 0.933759  |
| C | 3.786319  | 2.074265  | 3.074130  |
| C | 1.582864  | 2.154396  | 4.065167  |
| H | -0.068413 | 2.239650  | 2.682076  |
| C | 1.468699  | -4.415770 | 0.774264  |
| C | 1.066021  | -3.857341 | -1.552990 |
| C | 0.024318  | -1.295422 | 2.914723  |
| C | -1.362576 | -3.249107 | 2.562510  |
| C | 3.705389  | -1.925769 | -2.696645 |
| C | 1.852187  | -0.700770 | -3.666229 |

---

---

|   |           |           |           |
|---|-----------|-----------|-----------|
| C | 3.561784  | -1.256410 | 1.288782  |
| C | 4.982727  | -0.070312 | -0.265928 |
| C | -5.731842 | -0.282304 | -3.654009 |
| H | -5.586067 | 1.848313  | -3.331798 |
| H | -5.627099 | -2.437213 | -3.771154 |
| H | -3.950462 | 0.211911  | 4.410033  |
| C | -5.115875 | -1.361638 | 3.502953  |
| H | -6.117068 | -2.869826 | 2.321838  |
| H | 2.272305  | 7.082809  | 0.601840  |
| C | 0.813541  | 6.808714  | -0.967617 |
| H | -0.637015 | 6.221273  | -2.457162 |
| C | 2.972746  | 2.080651  | 4.210822  |
| H | 4.867062  | 2.013754  | 3.172332  |
| H | 0.941824  | 2.173788  | 4.943784  |
| H | 1.310080  | -4.217151 | 1.830664  |
| C | 2.283935  | -5.478247 | 0.374547  |
| H | 0.626319  | -3.204163 | -2.302611 |
| C | 1.873523  | -4.924881 | -1.947599 |
| C | -0.295635 | -1.312577 | 4.274267  |
| H | 0.662189  | -0.519890 | 2.494646  |
| H | -1.786799 | -3.999808 | 1.899652  |
| C | -1.686777 | -3.264286 | 3.919732  |
| H | 4.338984  | -2.167218 | -1.848874 |
| C | 3.905649  | -2.583744 | -3.914895 |
| C | 2.067061  | -1.345831 | -4.883506 |
| H | 1.020159  | -0.006144 | -3.558350 |
| H | 2.567912  | -1.598678 | 1.567835  |
| C | 4.655163  | -1.465845 | 2.131856  |
| C | 6.072427  | -0.251685 | 0.588747  |
| H | 5.118587  | 0.451727  | -1.210905 |
| H | -6.484970 | -0.195392 | -4.433772 |
| H | -5.702728 | -1.556145 | 4.397712  |
| H | 0.749242  | 7.868626  | -1.203489 |

---

|   |           |           |           |
|---|-----------|-----------|-----------|
| H | 3.417279  | 2.031520  | 5.202017  |
| H | 2.763292  | -6.102897 | 1.124761  |
| C | 2.485447  | -5.734499 | -0.985121 |
| H | 2.037264  | -5.110948 | -3.005523 |
| H | 0.115481  | -0.551475 | 4.933411  |
| C | -1.151907 | -2.295741 | 4.777223  |
| H | -2.362733 | -4.022611 | 4.307759  |
| C | 3.092878  | -2.293313 | -5.012023 |
| H | 4.696437  | -3.326107 | -4.001037 |
| H | 1.425848  | -1.115218 | -5.731505 |
| H | 4.524013  | -2.012328 | 3.063109  |
| C | 5.909976  | -0.952346 | 1.789529  |
| H | 7.047456  | 0.147536  | 0.317498  |
| H | 3.121917  | -6.560472 | -1.294268 |
| H | -1.412711 | -2.304803 | 5.833212  |
| H | 3.250632  | -2.803146 | -5.959992 |
| H | 6.758574  | -1.094046 | 2.455078  |

**cis-1b**

| Atomic center | X         | Y         | Z         |
|---------------|-----------|-----------|-----------|
| Ir            | -0.967562 | 1.107539  | -0.053154 |
| H             | -1.062866 | 0.993800  | 1.512120  |
| P             | -2.609615 | -0.570106 | -0.273964 |
| Cl            | -0.749647 | 1.020180  | -2.571690 |
| P             | 0.921039  | 2.497931  | 0.161386  |
| C             | 0.619248  | -0.500533 | 0.108764  |
| C             | -2.237381 | 2.497523  | -0.043208 |
| C             | -1.650701 | -2.000034 | -0.971265 |
| C             | -3.989662 | -0.299105 | -1.414457 |
| C             | -3.359079 | -1.112245 | 1.284481  |
| C             | 0.773112  | 4.220299  | -0.356438 |
| C             | 1.753788  | 2.443971  | 1.775831  |
| C             | 2.145651  | 1.716360  | -1.003978 |
| P             | -0.078889 | -2.167551 | -0.062214 |



---

|   |           |           |           |
|---|-----------|-----------|-----------|
| P | 2.219142  | -0.083635 | -0.685854 |
| O | -3.010237 | 3.345547  | -0.014248 |
| H | -2.200106 | -2.946427 | -0.975012 |
| H | -1.408684 | -1.701617 | -1.997808 |
| C | -5.217577 | 0.133969  | -0.881917 |
| C | -3.838364 | -0.433102 | -2.805049 |
| C | -3.502256 | -0.186844 | 2.328255  |
| C | -3.881713 | -2.406939 | 1.425248  |
| C | 1.250522  | 5.272636  | 0.441666  |
| C | 0.124506  | 4.490255  | -1.575892 |
| C | 3.128027  | 2.725672  | 1.873320  |
| C | 1.032503  | 2.143823  | 2.940952  |
| H | 3.148321  | 2.146416  | -0.932996 |
| H | 1.745496  | 1.868611  | -2.010596 |
| C | 0.936166  | -3.391558 | -0.904140 |
| C | -0.442366 | -2.787722 | 1.591731  |
| C | 2.718199  | -0.917923 | -2.207155 |
| C | 3.546106  | -0.351813 | 0.517440  |
| H | -5.349049 | 0.234707  | 0.191397  |
| C | -6.281212 | 0.426245  | -1.736090 |
| H | -2.889558 | -0.731747 | -3.235645 |
| C | -4.911941 | -0.148381 | -3.649275 |
| H | -3.102531 | 0.816786  | 2.220383  |
| C | -4.156295 | -0.555289 | 3.505498  |
| H | -3.803874 | -3.126962 | 0.615021  |
| C | -4.515736 | -2.777840 | 2.610659  |
| C | 1.085730  | 6.591866  | 0.013142  |
| H | 1.737990  | 5.068973  | 1.390213  |
| H | -0.264276 | 3.677147  | -2.184094 |
| C | -0.025386 | 5.810983  | -1.996127 |
| H | 3.703743  | 2.986917  | 0.990469  |
| C | 3.770390  | 2.680238  | 3.110092  |
| C | 1.677204  | 2.102777  | 4.179024  |

---

---

|   |           |           |           |
|---|-----------|-----------|-----------|
| H | -0.034263 | 1.954062  | 2.880900  |
| C | 1.930033  | -4.068798 | -0.175385 |
| C | 0.740875  | -3.678226 | -2.264900 |
| C | -0.603555 | -1.917576 | 2.682290  |
| C | -0.664690 | -4.166962 | 1.755547  |
| C | 3.695610  | -1.927084 | -2.135854 |
| C | 2.212436  | -0.518134 | -3.456140 |
| C | 3.361889  | -1.041978 | 1.723317  |
| C | 4.818114  | 0.155159  | 0.193576  |
| C | -6.131448 | 0.283065  | -3.118532 |
| H | -7.227900 | 0.758792  | -1.319580 |
| H | -4.792418 | -0.258192 | -4.723542 |
| H | -4.276675 | 0.169429  | 4.306245  |
| C | -4.656368 | -1.852005 | 3.650463  |
| H | -4.911196 | -3.784023 | 2.718581  |
| H | 1.449783  | 7.407089  | 0.632274  |
| C | 0.453326  | 6.861249  | -1.203712 |
| H | -0.523610 | 6.021484  | -2.938455 |
| C | 3.047492  | 2.363262  | 4.264462  |
| H | 4.832870  | 2.897850  | 3.172702  |
| H | 1.107757  | 1.877433  | 5.076784  |
| H | 2.078006  | -3.857470 | 0.879428  |
| C | 2.707629  | -5.040192 | -0.803669 |
| H | -0.013228 | -3.153379 | -2.842271 |
| C | 1.526467  | -4.649025 | -2.885015 |
| C | -0.963587 | -2.428981 | 3.928380  |
| H | -0.493304 | -0.845093 | 2.561316  |
| H | -0.544485 | -4.848432 | 0.918254  |
| C | -1.026269 | -4.668469 | 3.005259  |
| H | 4.100562  | -2.236750 | -1.179334 |
| C | 4.156002  | -2.529808 | -3.304464 |
| C | 2.681195  | -1.130310 | -4.618699 |
| H | 1.455675  | 0.255238  | -3.523486 |

---

|   |           |           |           |
|---|-----------|-----------|-----------|
| H | 2.396775  | -1.458548 | 1.993544  |
| C | 4.433262  | -1.204600 | 2.605048  |
| C | 5.882796  | -0.009838 | 1.076566  |
| H | 4.983413  | 0.668325  | -0.750643 |
| H | -6.963333 | 0.506124  | -3.780960 |
| H | -5.162549 | -2.140318 | 4.567807  |
| H | 0.326936  | 7.889108  | -1.532679 |
| H | 3.548855  | 2.331365  | 5.228015  |
| H | 3.464886  | -5.574127 | -0.236391 |
| C | 2.501825  | -5.334886 | -2.155189 |
| H | 1.371662  | -4.873224 | -3.936229 |
| H | -1.094259 | -1.752816 | 4.768012  |
| C | -1.171793 | -3.801123 | 4.092457  |
| H | -1.190195 | -5.735086 | 3.129809  |
| C | 3.653392  | -2.132394 | -4.546803 |
| H | 4.914647  | -3.304653 | -3.242953 |
| H | 2.293405  | -0.811645 | -5.582277 |
| H | 4.282270  | -1.736433 | 3.540241  |
| C | 5.690634  | -0.687143 | 2.286196  |
| H | 6.861604  | 0.385671  | 0.820098  |
| H | 3.101109  | -6.100937 | -2.639634 |
| H | -1.452178 | -4.194432 | 5.065734  |
| H | 4.023977  | -2.596631 | -5.456838 |
| H | 6.521293  | -0.814457 | 2.974926  |
| H | 0.901991  | -0.444449 | 1.164525  |

***trans-1b***

| Atomic center | X         | Y        | Z         |
|---------------|-----------|----------|-----------|
| Ir            | -1.267291 | 0.39785  | -0.082621 |
| H             | -0.853271 | 0.12866  | 1.408581  |
| P             | -1.879332 | -1.88393 | -0.212566 |
| Cl            | -1.556359 | 0.67297  | -2.582775 |
| P             | -0.442835 | 2.59145  | 0.017913  |
| C             | 0.787406  | -0.27071 | -0.701776 |

---

|   |           |          |           |
|---|-----------|----------|-----------|
| C | -2.974683 | 0.97329  | 0.462777  |
| C | -0.341901 | -2.81105 | -0.718483 |
| C | -3.112680 | -2.36684 | -1.441699 |
| C | -2.345366 | -2.65746 | 1.368385  |
| C | -1.481175 | 3.86614  | -0.739507 |
| C | 0.000770  | 3.24952  | 1.652806  |
| C | 1.138110  | 2.57638  | -0.968345 |
| P | 1.114865  | -1.92377 | -0.072780 |
| P | 2.073044  | 1.01586  | -0.799415 |
| O | -3.996777 | 1.34443  | 0.835395  |
| H | -0.350242 | -3.84647 | -0.367627 |
| H | -0.273161 | -2.80060 | -1.812324 |
| C | -4.164177 | -1.48357 | -1.727464 |
| C | -3.066650 | -3.62455 | -2.067915 |
| C | -2.464675 | -1.90064 | 2.540747  |
| C | -2.596816 | -4.04042 | 1.406525  |
| C | -2.359816 | 4.58337  | 0.093371  |
| C | -1.516829 | 4.06722  | -2.128905 |
| C | 0.517286  | 4.55665  | 1.737145  |
| C | -0.141518 | 2.48555  | 2.817223  |
| H | 1.778620  | 3.44212  | -0.771294 |
| H | 0.834266  | 2.59437  | -2.020767 |
| C | 2.582557  | -2.70819 | -0.761758 |
| C | 1.088134  | -2.04767 | 1.714680  |
| C | 3.006034  | 0.79347  | -2.327030 |
| C | 3.181748  | 1.07557  | 0.609675  |
| H | -4.189478 | -0.49557 | -1.282811 |
| C | -5.170635 | -1.86429 | -2.615040 |
| H | -2.253232 | -4.31780 | -1.870498 |
| C | -4.072666 | -3.99626 | -2.960495 |
| H | -2.285672 | -0.83198 | 2.516338  |
| C | -2.813605 | -2.52127 | 3.742511  |
| H | -2.548323 | -4.63480 | 0.497536  |

---

---

|   |           |          |           |
|---|-----------|----------|-----------|
| C | -2.938682 | -4.65723 | 2.608985  |
| C | -3.252246 | 5.50043  | -0.461346 |
| H | -2.345301 | 4.43383  | 1.169113  |
| H | -0.885590 | 3.48972  | -2.794355 |
| C | -2.405425 | 4.99521  | -2.673254 |
| H | 0.598905  | 5.17197  | 0.844193  |
| C | 0.910743  | 5.07520  | 2.969994  |
| C | 0.245206  | 3.01246  | 4.052651  |
| H | -0.561014 | 1.48722  | 2.759339  |
| C | 3.495851  | -3.39669 | 0.054134  |
| C | 2.794928  | -2.62499 | -2.149918 |
| C | 1.220408  | -0.91690 | 2.532286  |
| C | 0.885090  | -3.31426 | 2.289746  |
| C | 4.408452  | 0.81406  | -2.350762 |
| C | 2.275847  | 0.62403  | -3.519964 |
| C | 4.054203  | -0.00691 | 0.830725  |
| C | 3.175391  | 2.16073  | 1.499167  |
| C | -5.127730 | -3.11880 | -3.230046 |
| H | -5.980927 | -1.17511 | -2.835152 |
| H | -4.032152 | -4.96835 | -3.444153 |
| H | -2.911622 | -1.92660 | 4.646691  |
| C | -3.044897 | -3.89790 | 3.780252  |
| H | -3.137255 | -5.72537 | 2.630448  |
| H | -3.927128 | 6.05228  | 0.186940  |
| C | -3.272812 | 5.71139  | -1.843502 |
| H | -2.424271 | 5.15096  | -3.748201 |
| C | 0.778166  | 4.30118  | 4.129982  |
| H | 1.306592  | 6.08538  | 3.029418  |
| H | 0.118156  | 2.42140  | 4.955802  |
| H | 3.335551  | -3.45562 | 1.126393  |
| C | 4.619213  | -3.99351 | -0.520501 |
| H | 2.100220  | -2.08603 | -2.788181 |
| C | 3.920282  | -3.22374 | -2.713431 |

---

---

|   |           |          |           |
|---|-----------|----------|-----------|
| C | 1.159643  | -1.05532 | 3.918155  |
| H | 1.353433  | 0.06450  | 2.097179  |
| H | 0.763419  | -4.19578 | 1.666285  |
| C | 0.821402  | -3.44366 | 3.676009  |
| H | 4.974689  | 0.96663  | -1.437956 |
| C | 5.078988  | 0.63885  | -3.563626 |
| C | 2.956712  | 0.45627  | -4.724320 |
| H | 1.185899  | 0.62799  | -3.515759 |
| H | 4.094032  | -0.83455 | 0.132178  |
| C | 4.886570  | -0.01117 | 1.947270  |
| C | 4.011794  | 2.14677  | 2.616701  |
| H | 2.524778  | 3.01009  | 1.338115  |
| H | -5.910145 | -3.40990 | -3.925456 |
| H | -3.321794 | -4.37845 | 4.714775  |
| H | -3.964936 | 6.43052  | -2.272873 |
| H | 1.074240  | 4.71148  | 5.091751  |
| H | 5.325837  | -4.52806 | 0.108205  |
| C | 4.832249  | -3.90663 | -1.900274 |
| H | 4.085102  | -3.15739 | -3.784884 |
| H | 1.264782  | -0.17687 | 4.548411  |
| C | 0.960817  | -2.31515 | 4.490373  |
| H | 0.654173  | -4.42117 | 4.118177  |
| C | 4.357341  | 0.45641  | -4.746094 |
| H | 6.165077  | 0.65295  | -3.582864 |
| H | 2.394768  | 0.33087  | -5.645716 |
| H | 5.560965  | -0.84687 | 2.111661  |
| C | 4.860276  | 1.06097  | 2.846707  |
| H | 4.000340  | 2.98966  | 3.301397  |
| H | 5.707572  | -4.37388 | -2.343104 |
| H | 0.908628  | -2.41901 | 5.570734  |
| H | 4.883948  | 0.32545  | -5.687574 |
| H | 5.511034  | 1.05498  | 3.716866  |
| H | 0.598283  | -0.47403 | -1.767572 |

---

| <b>1c</b>     |           |           |           |
|---------------|-----------|-----------|-----------|
| Atomic center | X         | Y         | Z         |
| Ir            | 0.213137  | -1.510509 | -0.023748 |
| H             | 0.260533  | -1.642447 | 1.536302  |
| P             | 2.480829  | -1.011548 | 0.009344  |
| Cl            | 0.162043  | -0.990985 | -2.555591 |
| P             | -2.108654 | -1.621961 | 0.091296  |
| B             | -0.123917 | 0.727978  | 0.295365  |
| C             | 0.489455  | -3.416514 | -0.222744 |
| C             | 2.705513  | 0.589631  | -0.885577 |
| C             | 3.552396  | -2.208215 | -0.835278 |
| C             | 3.244981  | -0.680511 | 1.630851  |
| C             | -2.887673 | -3.118971 | -0.590709 |
| C             | -2.890834 | -1.324307 | 1.711861  |
| C             | -2.744187 | -0.245927 | -0.968915 |
| P             | 1.456127  | 1.771826  | -0.241283 |
| P             | -1.845841 | 1.280886  | -0.471252 |
| O             | 0.660082  | -4.551102 | -0.305792 |
| H             | 3.728214  | 0.975473  | -0.854283 |
| H             | 2.414984  | 0.408387  | -1.924686 |
| C             | 4.150474  | -3.245686 | -0.101445 |
| C             | 3.653148  | -2.199069 | -2.235334 |
| C             | 2.442879  | -0.349197 | 2.730373  |
| C             | 4.643503  | -0.630541 | 1.756088  |
| C             | -3.816671 | -3.882547 | 0.130706  |
| C             | -2.477238 | -3.537112 | -1.869134 |
| C             | -4.243973 | -0.949192 | 1.775946  |
| C             | -2.168123 | -1.477944 | 2.901153  |
| H             | -3.828476 | -0.109073 | -0.935182 |
| H             | -2.426627 | -0.515714 | -1.978957 |
| C             | 1.403490  | 3.059956  | -1.531126 |
| C             | 2.158119  | 2.586679  | 1.226984  |
| C             | -1.928184 | 2.402468  | -1.903562 |

---

|   |           |           |           |
|---|-----------|-----------|-----------|
| C | -2.950156 | 2.056598  | 0.765061  |
| H | 4.060128  | -3.270740 | 0.980882  |
| C | 4.862572  | -4.248183 | -0.761001 |
| H | 3.149546  | -1.434987 | -2.818741 |
| C | 4.369833  | -3.203563 | -2.888340 |
| H | 1.363446  | -0.362347 | 2.626446  |
| C | 3.029776  | 0.023814  | 3.941112  |
| H | 5.274393  | -0.886273 | 0.909100  |
| C | 5.227119  | -0.267531 | 2.970044  |
| C | -4.339550 | -5.052214 | -0.428102 |
| H | -4.125816 | -3.574528 | 1.124763  |
| H | -1.730839 | -2.965205 | -2.415909 |
| C | -3.012339 | -4.699536 | -2.422871 |
| H | -4.825987 | -0.838207 | 0.865715  |
| C | -4.855271 | -0.716432 | 3.006604  |
| C | -2.782081 | -1.248072 | 4.134836  |
| H | -1.125696 | -1.775607 | 2.859531  |
| C | 1.631356  | 4.408188  | -1.218022 |
| C | 1.183174  | 2.677184  | -2.864864 |
| C | 1.280192  | 3.139937  | 2.171680  |
| C | 3.540964  | 2.736276  | 1.401578  |
| C | -1.850261 | 3.786033  | -1.673591 |
| C | -2.080264 | 1.925526  | -3.213077 |
| C | -2.638299 | 2.083044  | 2.129919  |
| C | -4.183270 | 2.574238  | 0.329485  |
| C | 4.977992  | -4.226014 | -2.154279 |
| H | 5.324397  | -5.046770 | -0.186353 |
| H | 4.445617  | -3.190060 | -3.972424 |
| H | 2.399606  | 0.287546  | 4.786424  |
| C | 4.420347  | 0.061649  | 4.064537  |
| H | 6.309971  | -0.241813 | 3.061668  |
| H | -5.054156 | -5.644959 | 0.137144  |
| C | -3.942825 | -5.459047 | -1.704142 |

---



---

|   |           |           |           |
|---|-----------|-----------|-----------|
| H | -2.693246 | -5.019456 | -3.411429 |
| C | -4.123880 | -0.863617 | 4.189683  |
| H | -5.899564 | -0.418260 | 3.042070  |
| H | -2.211745 | -1.372924 | 5.051819  |
| H | 1.806793  | 4.710474  | -0.190193 |
| C | 1.655201  | 5.364652  | -2.235854 |
| H | 0.979859  | 1.637772  | -3.111541 |
| C | 1.215035  | 3.638043  | -3.873592 |
| C | 1.780394  | 3.821419  | 3.282264  |
| H | 0.207553  | 3.030307  | 2.044077  |
| H | 4.238686  | 2.325595  | 0.680032  |
| C | 4.038538  | 3.403120  | 2.521312  |
| H | -1.731950 | 4.166244  | -0.662622 |
| C | -1.945546 | 4.678997  | -2.738754 |
| C | -2.190531 | 2.826203  | -4.274538 |
| H | -2.091254 | 0.861382  | -3.419887 |
| H | -1.706540 | 1.658683  | 2.483693  |
| C | -3.542720 | 2.624538  | 3.046603  |
| C | -5.085722 | 3.109007  | 1.247688  |
| H | -4.432527 | 2.570128  | -0.728490 |
| H | 5.533796  | -5.007086 | -2.666400 |
| H | 4.876103  | 0.346652  | 5.009336  |
| H | -4.350267 | -6.369770 | -2.135515 |
| H | -4.600316 | -0.681624 | 5.149658  |
| H | 1.841195  | 6.406809  | -1.989365 |
| C | 1.454991  | 4.980528  | -3.563125 |
| H | 1.047202  | 3.337341  | -4.903870 |
| H | 1.092418  | 4.248933  | 4.007136  |
| C | 3.160594  | 3.947278  | 3.462919  |
| H | 5.112462  | 3.495976  | 2.657365  |
| C | -2.128617 | 4.201002  | -4.039745 |
| H | -1.880783 | 5.747258  | -2.552365 |
| H | -2.319776 | 2.448266  | -5.285262 |

---

|   |           |          |           |
|---|-----------|----------|-----------|
| H | -3.292929 | 2.633318 | 4.104125  |
| C | -4.765080 | 3.137790 | 2.609512  |
| H | -6.035417 | 3.507834 | 0.900659  |
| H | 1.482655  | 5.724594 | -4.355042 |
| H | 3.551113  | 4.467537 | 4.333653  |
| H | -2.214453 | 4.899490 | -4.868033 |
| H | -5.467764 | 3.557829 | 3.324611  |
| H | -0.211315 | 0.987699 | 1.465457  |

**6c**

| Atomic center | X         | Y         | Z         |
|---------------|-----------|-----------|-----------|
| Ir            | -1.089824 | 0.823382  | -0.113372 |
| H             | -0.758427 | 0.326058  | 1.341282  |
| P             | -2.417137 | -1.096857 | -0.302629 |
| Cl            | -1.272914 | 1.434121  | -2.584624 |
| P             | 0.504294  | 2.505763  | 0.055432  |
| B             | 0.575438  | -0.546267 | -0.798567 |
| C             | -2.513924 | 1.974352  | 0.509134  |
| C             | -1.384253 | -2.600387 | -0.704574 |
| C             | -3.710963 | -1.108198 | -1.579075 |
| C             | -3.250098 | -1.616470 | 1.245789  |
| C             | -0.032263 | 4.152371  | -0.503091 |
| C             | 1.247744  | 2.833560  | 1.692186  |
| C             | 1.947068  | 2.065263  | -1.029266 |
| P             | 0.301288  | -2.279019 | -0.054906 |
| P             | 2.316523  | 0.273128  | -0.879400 |
| O             | -3.330527 | 2.653718  | 0.957467  |
| H             | -1.826819 | -3.521775 | -0.317346 |
| H             | -1.286061 | -2.668578 | -1.792829 |
| C             | -4.335724 | 0.104255  | -1.903075 |
| C             | -4.118909 | -2.291785 | -2.215596 |
| C             | -3.084761 | -0.895467 | 2.433595  |
| C             | -4.049753 | -2.771708 | 1.248689  |
| C             | -0.619620 | 5.015938  | 0.437422  |

---

|   |           |           |           |
|---|-----------|-----------|-----------|
| C | 0.007082  | 4.524648  | -1.854908 |
| C | 2.161903  | 3.894208  | 1.826072  |
| C | 0.943657  | 2.046261  | 2.807063  |
| H | 2.821169  | 2.711612  | -0.901924 |
| H | 1.567518  | 2.161264  | -2.053547 |
| C | 1.397286  | -3.597874 | -0.659873 |
| C | 0.177412  | -2.411163 | 1.744333  |
| C | 3.189061  | -0.173888 | -2.411231 |
| C | 3.452485  | -0.011059 | 0.501329  |
| H | -3.990168 | 1.028181  | -1.453994 |
| C | -5.372106 | 0.127541  | -2.837120 |
| H | -3.633467 | -3.237782 | -1.990123 |
| C | -5.151222 | -2.262771 | -3.154688 |
| H | -2.473363 | -0.001010 | 2.437022  |
| C | -3.694982 | -1.330939 | 3.612521  |
| H | -4.215616 | -3.323344 | 0.326722  |
| C | -4.654865 | -3.208074 | 2.426822  |
| C | -1.147353 | 6.241368  | 0.031227  |
| H | -0.665066 | 4.733778  | 1.485767  |
| H | 0.407648  | 3.850708  | -2.603123 |
| C | -0.515492 | 5.756669  | -2.253790 |
| H | 2.377571  | 4.535141  | 0.974494  |
| C | 2.781521  | 4.140040  | 3.050432  |
| C | 1.561908  | 2.296656  | 4.035580  |
| H | 0.222351  | 1.242432  | 2.713166  |
| C | 1.832214  | -4.650598 | 0.159854  |
| C | 1.867308  | -3.498509 | -1.981875 |
| C | 0.825524  | -1.464956 | 2.548962  |
| C | -0.593410 | -3.420298 | 2.341397  |
| C | 4.521646  | -0.607025 | -2.417850 |
| C | 2.462943  | -0.102488 | -3.614056 |
| C | 3.756731  | -1.343279 | 0.833934  |
| C | 4.016896  | 1.033198  | 1.244897  |

---

---

|   |           |           |           |
|---|-----------|-----------|-----------|
| C | -5.782262 | -1.053353 | -3.462012 |
| H | -5.846531 | 1.072410  | -3.087836 |
| H | -5.459953 | -3.181772 | -3.646276 |
| H | -3.558967 | -0.762670 | 4.529077  |
| C | -4.475105 | -2.488658 | 3.614055  |
| H | -5.274511 | -4.101222 | 2.417014  |
| H | -1.600720 | 6.901733  | 0.765778  |
| C | -1.091943 | 6.615946  | -1.314961 |
| H | -0.481243 | 6.037475  | -3.303051 |
| C | 2.484941  | 3.336593  | 4.158453  |
| H | 3.485774  | 4.962683  | 3.144582  |
| H | 1.313616  | 1.684287  | 4.898712  |
| H | 1.485627  | -4.719271 | 1.186925  |
| C | 2.726727  | -5.598919 | -0.342755 |
| H | 1.555255  | -2.668545 | -2.609964 |
| C | 2.758315  | -4.450579 | -2.477033 |
| C | 0.710720  | -1.533832 | 3.937536  |
| H | 1.403100  | -0.669547 | 2.093799  |
| H | -1.118253 | -4.146803 | 1.728299  |
| C | -0.713084 | -3.481987 | 3.729579  |
| H | 5.085316  | -0.659121 | -1.491193 |
| C | 5.123375  | -0.981544 | -3.622620 |
| C | 3.074831  | -0.470051 | -4.812280 |
| H | 1.425572  | 0.228159  | -3.610787 |
| H | 3.338855  | -2.162618 | 0.256406  |
| C | 4.597035  | -1.621627 | 1.910341  |
| C | 4.850112  | 0.749455  | 2.329434  |
| H | 3.797668  | 2.065122  | 1.000791  |
| H | -6.584492 | -1.031047 | -4.195087 |
| H | -4.950731 | -2.825919 | 4.531529  |
| H | -1.501649 | 7.571745  | -1.631173 |
| H | 2.962794  | 3.532245  | 5.115026  |
| H | 3.064049  | -6.412258 | 0.294530  |

---

|   |           |           |           |
|---|-----------|-----------|-----------|
| C | 3.189365  | -5.500396 | -1.658572 |
| H | 3.123087  | -4.365146 | -3.497102 |
| H | 1.219444  | -0.798008 | 4.554170  |
| C | -0.059383 | -2.539516 | 4.528904  |
| H | -1.324901 | -4.255967 | 4.183977  |
| C | 4.402337  | -0.915583 | -4.817440 |
| H | 6.155776  | -1.321271 | -3.625184 |
| H | 2.514149  | -0.410945 | -5.741510 |
| H | 4.824653  | -2.654163 | 2.161241  |
| C | 5.137859  | -0.575430 | 2.665962  |
| H | 5.270686  | 1.566740  | 2.908484  |
| H | 3.888209  | -6.238045 | -2.044384 |
| H | -0.156118 | -2.586094 | 5.610545  |
| H | 4.873509  | -1.205904 | -5.753014 |
| H | 5.785387  | -0.793717 | 3.511188  |
| H | 0.359547  | -0.792816 | -1.963733 |

**6b**

| Atomic center | X         | Y         | Z         |
|---------------|-----------|-----------|-----------|
| Ir            | -1.025134 | 0.998247  | -0.145560 |
| H             | -1.014310 | 0.825415  | 1.411040  |
| P             | -2.539616 | -0.798014 | -0.259847 |
| Cl            | -0.955945 | 1.077687  | -2.719252 |
| P             | 0.775605  | 2.477876  | 0.045908  |
| C             | 0.589783  | -0.491096 | -0.240011 |
| C             | -2.382280 | 2.306017  | -0.059256 |
| C             | -1.556606 | -2.254102 | -0.839069 |
| C             | -3.952118 | -0.665909 | -1.394090 |
| C             | -3.264412 | -1.261481 | 1.345031  |
| C             | 0.536813  | 4.200055  | -0.482624 |
| C             | 1.547302  | 2.542426  | 1.694012  |
| C             | 2.058354  | 1.759225  | -1.076050 |
| P             | 0.109881  | -2.112183 | -0.066550 |
| P             | 2.171448  | -0.036062 | -0.698853 |

---

|   |           |           |           |
|---|-----------|-----------|-----------|
| O | -3.208562 | 3.107139  | 0.010512  |
| H | -2.042591 | -3.211325 | -0.631164 |
| H | -1.429161 | -2.122525 | -1.917930 |
| C | -5.221485 | -0.342012 | -0.885983 |
| C | -3.770803 | -0.800168 | -2.780412 |
| C | -3.424901 | -0.281052 | 2.333817  |
| C | -3.734424 | -2.561404 | 1.582358  |
| C | 1.058617  | 5.278735  | 0.249585  |
| C | -0.212238 | 4.439981  | -1.647961 |
| C | 2.918566  | 2.803670  | 1.839672  |
| C | 0.759604  | 2.362511  | 2.839668  |
| H | 3.033433  | 2.250667  | -1.020575 |
| H | 1.642913  | 1.854922  | -2.084888 |
| C | 1.191208  | -3.352991 | -0.820685 |
| C | -0.187382 | -2.674944 | 1.643881  |
| C | 2.875468  | -0.820055 | -2.189437 |
| C | 3.474061  | -0.166316 | 0.574714  |
| H | -5.373772 | -0.236365 | 0.184163  |
| C | -6.296975 | -0.161630 | -1.757180 |
| H | -2.787895 | -1.003759 | -3.190201 |
| C | -4.853032 | -0.625276 | -3.643390 |
| H | -3.062843 | 0.725716  | 2.155083  |
| C | -4.038878 | -0.597778 | 3.546956  |
| H | -3.641071 | -3.328925 | 0.819432  |
| C | -4.330111 | -2.881268 | 2.802353  |
| C | 0.837643  | 6.587166  | -0.186889 |
| H | 1.624901  | 5.102794  | 1.158931  |
| H | -0.630338 | 3.608351  | -2.209157 |
| C | -0.421495 | 5.750187  | -2.078407 |
| H | 3.544966  | 2.958016  | 0.967476  |
| C | 3.496319  | 2.854519  | 3.108207  |
| C | 1.336982  | 2.421896  | 4.109286  |
| H | -0.304403 | 2.174519  | 2.735679  |

---

---

|   |           |           |           |
|---|-----------|-----------|-----------|
| C | 2.188779  | -3.972352 | -0.051770 |
| C | 1.087067  | -3.639049 | -2.190691 |
| C | -0.224006 | -1.729978 | 2.675889  |
| C | -0.465940 | -4.022541 | 1.920073  |
| C | 3.999741  | -1.655461 | -2.134881 |
| C | 2.234224  | -0.590872 | -3.418730 |
| C | 3.162850  | -0.710231 | 1.824218  |
| C | 4.767711  | 0.325576  | 0.333344  |
| C | -6.115676 | -0.305652 | -3.135544 |
| H | -7.276125 | 0.087459  | -1.356693 |
| H | -4.705230 | -0.729030 | -4.715045 |
| H | -4.164513 | 0.171449  | 4.304581  |
| C | -4.484982 | -1.899727 | 3.786190  |
| H | -4.677953 | -3.894987 | 2.982407  |
| H | 1.238521  | 7.419397  | 0.385972  |
| C | 0.101136  | 6.824489  | -1.350582 |
| H | -1.001492 | 5.930772  | -2.979673 |
| C | 2.707325  | 2.660527  | 4.245467  |
| H | 4.561944  | 3.041353  | 3.206207  |
| H | 0.716483  | 2.282929  | 4.991006  |
| H | 2.273521  | -3.753590 | 1.008673  |
| C | 3.066212  | -4.879519 | -0.648484 |
| H | 0.336773  | -3.145114 | -2.800683 |
| C | 1.961784  | -4.550397 | -2.779476 |
| C | -0.542960 | -2.127243 | 3.975741  |
| H | -0.014599 | -0.689031 | 2.448557  |
| H | -0.431440 | -4.762339 | 1.123715  |
| C | -0.775493 | -4.418106 | 3.221213  |
| H | 4.490480  | -1.853561 | -1.188180 |
| C | 4.486854  | -2.246240 | -3.302862 |
| C | 2.733525  | -1.175567 | -4.582198 |
| H | 1.339815  | 0.026580  | -3.460800 |
| H | 2.157576  | -1.072010 | 2.009944  |

---

|   |           |           |           |
|---|-----------|-----------|-----------|
| C | 4.131333  | -0.762478 | 2.829497  |
| C | 5.732818  | 0.277371  | 1.338747  |
| H | 5.022222  | 0.740529  | -0.639101 |
| H | -6.955001 | -0.167017 | -3.812094 |
| H | -4.954933 | -2.149717 | 4.733881  |
| H | -0.070934 | 7.844042  | -1.686020 |
| H | 3.158633  | 2.699212  | 5.233564  |
| H | 3.836089  | -5.358608 | -0.049326 |
| C | 2.949089  | -5.173398 | -2.009332 |
| H | 1.877824  | -4.768408 | -3.840227 |
| H | -0.580818 | -1.388837 | 4.772350  |
| C | -0.818919 | -3.469143 | 4.248927  |
| H | -0.983813 | -5.463301 | 3.434840  |
| C | 3.861839  | -2.001414 | -4.527382 |
| H | 5.354874  | -2.898355 | -3.252618 |
| H | 2.240522  | -0.984988 | -5.532148 |
| H | 3.879915  | -1.181576 | 3.800379  |
| C | 5.414791  | -0.267133 | 2.588933  |
| H | 6.732177  | 0.660645  | 1.148765  |
| H | 3.628761  | -5.884291 | -2.471933 |
| H | -1.067077 | -3.777994 | 5.261138  |
| H | 4.248812  | -2.455846 | -5.436071 |
| H | 6.168201  | -0.302571 | 3.371760  |

**3c**

| Atomic center | X         | Y         | Z         |
|---------------|-----------|-----------|-----------|
| Ir            | 0.108846  | -1.425129 | 0.109731  |
| P             | 2.395399  | -1.275351 | 0.171055  |
| P             | -2.110170 | -1.043712 | -0.338562 |
| B             | 0.376603  | 0.822833  | 0.498066  |
| C             | -0.015045 | -3.299109 | -0.070373 |
| C             | 2.860501  | 0.064917  | -1.036488 |
| C             | 3.420287  | -2.702038 | -0.319833 |
| C             | 3.140959  | -0.722664 | 1.747013  |



---

|   |           |           |           |
|---|-----------|-----------|-----------|
| C | -2.795503 | -1.865166 | -1.822932 |
| C | -3.283788 | -1.432405 | 1.007048  |
| C | -2.384337 | 0.759211  | -0.731563 |
| P | 1.583055  | 1.396352  | -0.874982 |
| P | -1.330083 | 1.707796  | 0.429111  |
| O | -0.086636 | -4.455424 | -0.147187 |
| H | 3.866099  | 0.468366  | -0.881736 |
| H | 2.796393  | -0.352370 | -2.046872 |
| C | 3.210601  | -3.904835 | 0.373952  |
| C | 4.396366  | -2.647760 | -1.325464 |
| C | 2.365090  | -0.780982 | 2.912392  |
| C | 4.466257  | -0.270039 | 1.816695  |
| C | -4.173096 | -1.846146 | -2.092118 |
| C | -1.923611 | -2.498208 | -2.718894 |
| C | -4.462244 | -0.713595 | 1.253493  |
| C | -2.956851 | -2.516991 | 1.836615  |
| H | -3.434991 | 1.063259  | -0.721341 |
| H | -1.978571 | 0.912489  | -1.738746 |
| C | 0.702443  | 1.501203  | -2.457226 |
| C | 2.524670  | 2.929382  | -0.610169 |
| C | -1.405610 | 3.448201  | -0.085837 |
| C | -2.109362 | 1.600870  | 2.062884  |
| H | 2.449818  | -3.958411 | 1.148493  |
| C | 3.966950  | -5.034805 | 0.066560  |
| H | 4.579541  | -1.726610 | -1.871342 |
| C | 5.147891  | -3.784940 | -1.636912 |
| H | 1.336950  | -1.127875 | 2.841623  |
| C | 2.906210  | -0.380700 | 4.135806  |
| H | 5.085388  | -0.244673 | 0.922547  |
| C | 5.003602  | 0.139511  | 3.038263  |
| C | -4.668695 | -2.445092 | -3.251372 |
| H | -4.860549 | -1.384241 | -1.387984 |
| H | -0.861151 | -2.522336 | -2.494586 |

---

---

|   |           |           |           |
|---|-----------|-----------|-----------|
| C | -2.422507 | -3.100897 | -3.876169 |
| H | -4.731802 | 0.139588  | 0.638938  |
| C | -5.297670 | -1.070443 | 2.313206  |
| C | -3.799993 | -2.881215 | 2.886820  |
| H | -2.031642 | -3.059979 | 1.667074  |
| C | 0.229181  | 2.727027  | -2.947373 |
| C | 0.323714  | 0.304291  | -3.088026 |
| C | 2.756610  | 3.330464  | 0.714626  |
| C | 3.085575  | 3.661242  | -1.668821 |
| C | -0.502017 | 4.345043  | 0.507435  |
| C | -2.280023 | 3.904760  | -1.082794 |
| C | -1.720543 | 0.578226  | 2.941304  |
| C | -3.134714 | 2.487333  | 2.424133  |
| C | 4.935469  | -4.977687 | -0.941865 |
| H | 3.795188  | -5.961681 | 0.607375  |
| H | 5.899171  | -3.735750 | -2.421030 |
| H | 2.301137  | -0.428607 | 5.037776  |
| C | 4.223205  | 0.085160  | 4.198659  |
| H | 6.030307  | 0.493313  | 3.086990  |
| H | -5.737086 | -2.433444 | -3.451569 |
| C | -3.793616 | -3.071837 | -4.145675 |
| H | -1.742239 | -3.601944 | -4.560603 |
| C | -4.970087 | -2.156193 | 3.129884  |
| H | -6.201520 | -0.497324 | 2.502679  |
| H | -3.538040 | -3.724817 | 3.520323  |
| H | 0.491248  | 3.654186  | -2.448778 |
| C | -0.603358 | 2.753372  | -4.068928 |
| H | 0.637572  | -0.650846 | -2.672414 |
| C | -0.511395 | 0.337093  | -4.204798 |
| C | 3.529713  | 4.462887  | 0.976881  |
| H | 2.333576  | 2.753740  | 1.533261  |
| H | 2.921761  | 3.348616  | -2.696259 |
| C | 3.849310  | 4.799077  | -1.401545 |

---

|   |           |           |           |
|---|-----------|-----------|-----------|
| H | 0.179394  | 3.998651  | 1.278563  |
| C | -0.463364 | 5.676807  | 0.096789  |
| C | -2.241391 | 5.240725  | -1.489517 |
| H | -2.978447 | 3.221176  | -1.555363 |
| H | -0.933539 | -0.110753 | 2.648399  |
| C | -2.367692 | 0.437845  | 4.168505  |
| C | -3.773197 | 2.344863  | 3.657126  |
| H | -3.425757 | 3.289608  | 1.750534  |
| H | 5.519900  | -5.860977 | -1.185745 |
| H | 4.644036  | 0.400209  | 5.150190  |
| H | -4.182509 | -3.546195 | -5.043118 |
| H | -5.621822 | -2.432277 | 3.954833  |
| H | -0.966848 | 3.706566  | -4.443259 |
| C | -0.974208 | 1.561881  | -4.698080 |
| H | -0.815062 | -0.592982 | -4.675648 |
| H | 3.708859  | 4.767758  | 2.004719  |
| C | 4.069932  | 5.201921  | -0.080110 |
| H | 4.275194  | 5.368183  | -2.223796 |
| C | -1.330916 | 6.125773  | -0.905536 |
| H | 0.246213  | 6.361133  | 0.554022  |
| H | -2.920511 | 5.588091  | -2.263843 |
| H | -2.076594 | -0.363844 | 4.841625  |
| C | -3.392865 | 1.318095  | 4.526873  |
| H | -4.564234 | 3.034921  | 3.938878  |
| H | -1.625558 | 1.585490  | -5.567924 |
| H | 4.666557  | 6.087177  | 0.124406  |
| H | -1.298777 | 7.163344  | -1.227587 |
| H | -3.894517 | 1.205749  | 5.484618  |
| H | 0.872370  | 1.053548  | 1.572975  |

**4b**

| Atomic center | X         | Y         | Z         |
|---------------|-----------|-----------|-----------|
| Ir            | -1.039938 | 1.017908  | -0.179121 |
| P             | -2.543295 | -0.728528 | -0.347908 |

---

|   |           |           |           |
|---|-----------|-----------|-----------|
| P | 0.714589  | 2.488009  | -0.011299 |
| C | 0.526554  | -0.438256 | -0.383928 |
| C | -2.374344 | 2.309909  | -0.069301 |
| C | -1.591907 | -2.245923 | -0.882167 |
| C | -3.849537 | -0.564644 | -1.607306 |
| C | -3.377194 | -1.193705 | 1.206550  |
| C | 0.501288  | 4.198339  | -0.591524 |
| C | 1.472673  | 2.552469  | 1.645185  |
| C | 2.064548  | 1.808326  | -1.101584 |
| P | 0.071507  | -2.066059 | -0.127868 |
| P | 2.130980  | 0.002368  | -0.783589 |
| O | -3.204260 | 3.123399  | -0.011660 |
| H | -2.074655 | -3.192198 | -0.623117 |
| H | -1.483340 | -2.172438 | -1.969235 |
| C | -5.078358 | -1.234707 | -1.515180 |
| C | -3.583510 | 0.262413  | -2.710132 |
| C | -3.622956 | -0.170005 | 2.135477  |
| C | -3.781032 | -2.503000 | 1.507242  |
| C | 1.119668  | 5.299065  | 0.018887  |
| C | -0.327224 | 4.392433  | -1.708745 |
| C | 2.819034  | 2.890214  | 1.850798  |
| C | 0.673807  | 2.203404  | 2.744640  |
| H | 3.041754  | 2.278082  | -0.953678 |
| H | 1.740639  | 1.966953  | -2.134983 |
| C | 1.187200  | -3.321370 | -0.808625 |
| C | -0.214648 | -2.523709 | 1.615417  |
| C | 2.764249  | -0.769519 | -2.308823 |
| C | 3.416606  | -0.189275 | 0.493679  |
| H | -5.298651 | -1.854388 | -0.650241 |
| C | -6.029661 | -1.084510 | -2.526790 |
| H | -2.639940 | 0.803704  | -2.749586 |
| C | -4.535623 | 0.403997  | -3.721017 |
| H | -3.288945 | 0.839779  | 1.917383  |

---

---

|   |           |           |           |
|---|-----------|-----------|-----------|
| C | -4.267970 | -0.451297 | 3.340118  |
| H | -3.603719 | -3.313126 | 0.806357  |
| C | -4.412603 | -2.784995 | 2.720113  |
| C | 0.915853  | 6.583136  | -0.493138 |
| H | 1.743000  | 5.158031  | 0.897131  |
| H | -0.835594 | 3.538087  | -2.151503 |
| C | -0.519714 | 5.675259  | -2.221326 |
| H | 3.453328  | 3.159210  | 1.011172  |
| C | 3.361044  | 2.868425  | 3.136304  |
| C | 1.215779  | 2.189850  | 4.031093  |
| H | -0.365010 | 1.929351  | 2.574267  |
| C | 2.250189  | -3.800354 | -0.026394 |
| C | 1.060876  | -3.739415 | -2.142128 |
| C | -0.403867 | -1.507409 | 2.560304  |
| C | -0.356695 | -3.867473 | 1.994438  |
| C | 3.907552  | -1.576037 | -2.353581 |
| C | 2.008658  | -0.566267 | -3.476818 |
| C | 3.049389  | -0.666941 | 1.756392  |
| C | 4.740322  | 0.221177  | 0.262564  |
| C | -5.758178 | -0.269601 | -3.630540 |
| H | -6.985056 | -1.597158 | -2.449461 |
| H | -4.330836 | 1.049786  | -4.571237 |
| H | -4.457322 | 0.350369  | 4.049460  |
| C | -4.659490 | -1.759849 | 3.637283  |
| H | -4.711909 | -3.805024 | 2.946788  |
| H | 1.388313  | 7.435994  | -0.012563 |
| C | 0.102163  | 6.771708  | -1.614025 |
| H | -1.166072 | 5.822360  | -3.082704 |
| C | 2.560492  | 2.517355  | 4.227681  |
| H | 4.407810  | 3.119496  | 3.284843  |
| H | 0.590637  | 1.920469  | 4.878820  |
| H | 2.353881  | -3.478905 | 1.005641  |
| C | 3.171514  | -4.695020 | -0.573215 |

---

---

|   |           |           |           |
|---|-----------|-----------|-----------|
| H | 0.253100  | -3.361950 | -2.762202 |
| C | 1.981527  | -4.636757 | -2.682194 |
| C | -0.734109 | -1.832835 | 3.876599  |
| H | -0.307573 | -0.469641 | 2.251145  |
| H | -0.209499 | -4.659930 | 1.264711  |
| C | -0.680404 | -4.188649 | 3.313147  |
| H | 4.481431  | -1.760575 | -1.451793 |
| C | 4.299610  | -2.163201 | -3.559736 |
| C | 2.409288  | -1.145402 | -4.679456 |
| H | 1.099465  | 0.030582  | -3.435644 |
| H | 2.018462  | -0.947194 | 1.942289  |
| C | 3.996612  | -0.747815 | 2.779084  |
| C | 5.685039  | 0.140265  | 1.285812  |
| H | 5.033617  | 0.601081  | -0.713111 |
| H | -6.503219 | -0.150722 | -4.413096 |
| H | -5.153209 | -1.981183 | 4.580078  |
| H | -0.057026 | 7.772541  | -2.007029 |
| H | 2.985138  | 2.498533  | 5.228204  |
| H | 3.991130  | -5.064916 | 0.037294  |
| C | 3.035577  | -5.116603 | -1.898615 |
| H | 1.878633  | -4.957696 | -3.714951 |
| H | -0.892658 | -1.041021 | 4.603811  |
| C | -0.872345 | -3.170894 | 4.254103  |
| H | -0.785426 | -5.230023 | 3.606432  |
| C | 3.558820  | -1.943715 | -4.722535 |
| H | 5.182956  | -2.795731 | -3.586621 |
| H | 1.827079  | -0.977115 | -5.581884 |
| H | 3.701022  | -1.111998 | 3.759454  |
| C | 5.313950  | -0.346695 | 2.544747  |
| H | 6.708666  | 0.457246  | 1.103311  |
| H | 3.750396  | -5.817490 | -2.321871 |
| H | -1.131190 | -3.422952 | 5.279321  |
| H | 3.870596  | -2.396808 | -5.660103 |

---

| H             | 6.051321  | -0.405807 | 3.341252  |
|---------------|-----------|-----------|-----------|
| <b>1a</b>     |           |           |           |
| Atomic center | X         | Y         | Z         |
| C             | 2.462746  | -0.033536 | 2.284013  |
| C             | 1.249540  | 0.682345  | 2.881989  |
| N             | -0.001062 | 0.066510  | 2.340398  |
| Ir            | 0.000261  | -0.112881 | 0.143720  |
| C             | -1.250788 | 0.686289  | 2.879620  |
| C             | -2.464794 | -0.027949 | 2.281527  |
| C             | 0.002021  | -0.258419 | -1.709140 |
| Cl            | -0.000302 | -2.559336 | 0.693573  |
| H             | 0.000248  | 1.466817  | 0.065465  |
| O             | 0.003378  | -0.337215 | -2.857789 |
| H             | -0.002644 | -0.924430 | 2.611567  |
| P             | 2.338588  | 0.023125  | 0.429078  |
| C             | 3.415152  | -1.269007 | -0.233700 |
| C             | 4.182908  | -1.009819 | -1.382663 |
| C             | 4.957468  | -2.024622 | -1.945802 |
| C             | 4.972040  | -3.298217 | -1.369346 |
| C             | 4.204441  | -3.559724 | -0.230286 |
| C             | 3.420945  | -2.553933 | 0.335841  |
| C             | 3.081552  | 1.606898  | -0.060955 |
| C             | 2.419692  | 2.477435  | -0.937351 |
| C             | 3.027611  | 3.672251  | -1.331942 |
| C             | 4.296167  | 4.004553  | -0.850543 |
| C             | 4.964924  | 3.136221  | 0.020236  |
| C             | 4.364756  | 1.939001  | 0.408757  |
| P             | -2.338961 | 0.025231  | 0.426633  |
| C             | -3.417983 | -1.266670 | -0.232523 |
| C             | -3.423883 | -2.550496 | 0.339503  |
| C             | -4.210619 | -3.556203 | -0.222198 |
| C             | -4.981450 | -3.295675 | -1.359313 |
| C             | -4.966726 | -2.023241 | -1.938314 |

---

|   |           |           |           |
|---|-----------|-----------|-----------|
| C | -4.188806 | -1.008525 | -1.379617 |
| C | -3.078955 | 1.609527  | -0.066176 |
| C | -4.359863 | 1.947149  | 0.405801  |
| C | -4.956768 | 3.145547  | 0.015855  |
| C | -4.287130 | 4.009424  | -0.858666 |
| C | -3.020956 | 3.671496  | -1.342462 |
| C | -2.416225 | 2.475581  | -0.946341 |
| H | 2.465587  | -1.088272 | 2.579681  |
| H | 3.396281  | 0.425792  | 2.622176  |
| H | 1.237080  | 1.740250  | 2.600985  |
| H | 1.248155  | 0.606846  | 3.976755  |
| H | -1.250731 | 0.612913  | 3.974528  |
| H | -1.235631 | 1.743543  | 2.596314  |
| H | -3.397708 | 0.433680  | 2.618194  |
| H | -2.469986 | -1.082227 | 2.578692  |
| H | 4.182506  | -0.020444 | -1.830928 |
| H | 5.551152  | -1.818281 | -2.832243 |
| H | 5.578074  | -4.086261 | -1.808419 |
| H | 4.207489  | -4.550770 | 0.215165  |
| H | 2.799202  | -2.779925 | 1.194953  |
| H | 1.433779  | 2.219272  | -1.308847 |
| H | 2.510711  | 4.340682  | -2.015319 |
| H | 4.767010  | 4.935366  | -1.155406 |
| H | 5.955025  | 3.388806  | 0.390036  |
| H | 4.902491  | 1.258089  | 1.064235  |
| H | -2.799892 | -2.775617 | 1.197233  |
| H | -4.213801 | -4.546370 | 0.225207  |
| H | -5.590193 | -4.083594 | -1.794844 |
| H | -5.562969 | -1.817703 | -2.823219 |
| H | -4.188188 | -0.020021 | -1.829747 |
| H | -4.898304 | 1.269869  | 1.064450  |
| H | -5.945003 | 3.402556  | 0.387600  |
| H | -4.755421 | 4.941209  | -1.164484 |

---



|   |           |          |           |
|---|-----------|----------|-----------|
| H | -2.503438 | 4.336482 | -2.028725 |
| H | -1.431961 | 2.213028 | -1.319190 |

**3a**

| Atomic center | X         | Y         | Z         |
|---------------|-----------|-----------|-----------|
| C             | -2.440215 | 0.102190  | 2.342155  |
| C             | -1.196042 | -0.602406 | 2.893972  |
| N             | -0.000365 | -0.017664 | 2.294689  |
| Ir            | -0.000618 | -0.044764 | 0.156490  |
| C             | 1.200155  | -0.592440 | 2.893946  |
| C             | 2.438570  | 0.120075  | 2.339368  |
| C             | -0.001618 | 0.011489  | -1.720324 |
| Cl            | 0.001377  | -2.599834 | 0.304611  |
| H             | -0.002937 | 1.532117  | 0.227001  |
| O             | -0.002162 | 0.008247  | -2.880036 |
| P             | -2.304833 | 0.075364  | 0.494390  |
| C             | -3.064683 | 1.632944  | -0.085341 |
| C             | -4.125941 | 1.665907  | -0.999632 |
| C             | -4.632769 | 2.892217  | -1.442810 |
| C             | -4.088701 | 4.089224  | -0.972731 |
| C             | -3.027064 | 4.060387  | -0.060073 |
| C             | -2.512882 | 2.840121  | 0.375363  |
| C             | -3.379881 | -1.246267 | -0.135202 |
| C             | -2.946602 | -2.036656 | -1.207787 |
| C             | -3.788989 | -3.017488 | -1.736672 |
| C             | -5.061937 | -3.217355 | -1.196249 |
| C             | -5.498050 | -2.432100 | -0.123390 |
| C             | -4.660784 | -1.447758 | 0.403779  |
| P             | 2.303864  | 0.081158  | 0.492100  |
| C             | 3.378031  | -1.245633 | -0.128325 |
| C             | 2.947480  | -2.034907 | -1.202859 |
| C             | 3.788143  | -3.020129 | -1.726114 |
| C             | 5.056846  | -3.225783 | -1.177916 |
| C             | 5.490251  | -2.441850 | -0.103062 |

---

|   |           |           |           |
|---|-----------|-----------|-----------|
| C | 4.654687  | -1.452962 | 0.418404  |
| C | 3.065184  | 1.634420  | -0.097214 |
| C | 2.507737  | 2.845134  | 0.347032  |
| C | 3.025797  | 4.062021  | -0.093282 |
| C | 4.097330  | 4.083812  | -0.994470 |
| C | 4.647138  | 2.883196  | -1.448382 |
| C | 4.136269  | 1.660376  | -1.000296 |
| H | -3.373005 | -0.366008 | 2.672398  |
| H | -2.440805 | 1.156547  | 2.639467  |
| H | -1.161367 | -0.462084 | 3.988904  |
| H | -1.275619 | -1.688929 | 2.701802  |
| H | 1.165436  | -0.450426 | 3.988655  |
| H | 1.287964  | -1.678839 | 2.703815  |
| H | 3.375122  | -0.337378 | 2.673832  |
| H | 2.429025  | 1.176255  | 2.630203  |
| H | -4.554293 | 0.738020  | -1.366920 |
| H | -5.453107 | 2.908091  | -2.156453 |
| H | -4.484384 | 5.041340  | -1.318112 |
| H | -2.595097 | 4.989538  | 0.304275  |
| H | -1.669250 | 2.816330  | 1.061258  |
| H | -1.944605 | -1.906152 | -1.599484 |
| H | -3.442465 | -3.633807 | -2.562297 |
| H | -5.712638 | -3.986887 | -1.605109 |
| H | -6.487399 | -2.585385 | 0.301000  |
| H | -5.009620 | -0.831819 | 1.229069  |
| H | 1.948479  | -1.899985 | -1.600580 |
| H | 3.443468  | -3.635451 | -2.553245 |
| H | 5.706209  | -3.998856 | -1.582198 |
| H | 6.476214  | -2.599691 | 0.327494  |
| H | 5.001894  | -0.838441 | 1.245389  |
| H | 1.656829  | 2.826726  | 1.023988  |
| H | 2.589201  | 4.993915  | 0.258304  |
| H | 4.496174  | 5.033208  | -1.343681 |

---

| H             | 5.475189  | 2.893517  | -2.153166 |
|---------------|-----------|-----------|-----------|
| H             | 4.569199  | 0.729716  | -1.354947 |
| <b>6c</b>     |           |           |           |
| Atomic center | X         | Y         | Z         |
| Ir            | 0.034392  | -1.372840 | -0.464806 |
| P             | -2.163729 | -1.347011 | 0.116934  |
| Cl            | 0.113102  | 0.022313  | 3.475447  |
| P             | 2.260719  | -1.218400 | -0.002581 |
| B             | -0.015050 | 0.919901  | -0.506608 |
| C             | 0.073508  | -3.229179 | -0.795431 |
| C             | -2.494818 | 0.204456  | 1.086220  |
| C             | -2.610142 | -2.704843 | 1.254770  |
| C             | -3.466455 | -1.372442 | -1.168271 |
| C             | 2.860330  | -2.566949 | 1.075252  |
| C             | 3.471428  | -1.123094 | -1.368193 |
| C             | 2.531743  | 0.289249  | 1.041373  |
| P             | -1.721829 | 1.574152  | 0.149565  |
| P             | 1.615202  | 1.655409  | 0.246341  |
| O             | 0.094055  | -4.350143 | -1.107490 |
| H             | -3.545737 | 0.364683  | 1.348489  |
| H             | -1.879957 | 0.121357  | 1.999915  |
| C             | -3.262793 | -3.853371 | 0.780334  |
| C             | -2.151916 | -2.662765 | 2.581253  |
| C             | -3.071386 | -1.220645 | -2.503093 |
| C             | -4.828808 | -1.503894 | -0.859513 |
| C             | 3.961355  | -3.372620 | 0.756820  |
| C             | 2.112947  | -2.823267 | 2.237424  |
| C             | 4.763182  | -0.599839 | -1.216122 |
| C             | 3.062774  | -1.597379 | -2.622604 |
| H             | 3.581251  | 0.525195  | 1.246869  |
| H             | 1.982379  | 0.074298  | 1.976762  |
| C             | -1.897746 | 3.060528  | 1.200729  |
| C             | -2.818958 | 1.926702  | -1.273271 |

---

|   |           |           |           |
|---|-----------|-----------|-----------|
| C | 1.591354  | 3.046806  | 1.416989  |
| C | 2.736073  | 2.226294  | -1.089667 |
| H | -3.599609 | -3.902977 | -0.251137 |
| C | -3.472721 | -4.941768 | 1.629886  |
| H | -1.593864 | -1.804007 | 2.950637  |
| C | -2.372095 | -3.752629 | 3.425843  |
| H | -2.009893 | -1.124727 | -2.724488 |
| C | -4.029382 | -1.183118 | -3.519353 |
| H | -5.137489 | -1.638539 | 0.174529  |
| C | -5.784533 | -1.476766 | -1.875348 |
| C | 4.316366  | -4.431375 | 1.599217  |
| H | 4.534228  | -3.183614 | -0.146661 |
| H | 1.254690  | -2.199882 | 2.481828  |
| C | 2.481747  | -3.872813 | 3.078073  |
| H | 5.089523  | -0.227951 | -0.248640 |
| C | 5.630850  | -0.540549 | -2.307084 |
| C | 3.936647  | -1.552364 | -3.711272 |
| H | 2.050174  | -1.980973 | -2.733086 |
| C | -2.353601 | 4.273123  | 0.657615  |
| C | -1.551966 | 2.989809  | 2.560221  |
| C | -2.297294 | 2.412112  | -2.479586 |
| C | -4.208814 | 1.798087  | -1.133902 |
| C | 1.229598  | 4.314304  | 0.931065  |
| C | 1.919262  | 2.886140  | 2.769441  |
| C | 2.574167  | 1.779704  | -2.408307 |
| C | 3.832399  | 3.044160  | -0.771350 |
| C | -3.032274 | -4.892307 | 2.955853  |
| H | -3.976138 | -5.829009 | 1.252669  |
| H | -2.013723 | -3.708702 | 4.451683  |
| H | -3.717774 | -1.054514 | -4.553049 |
| C | -5.385019 | -1.311696 | -3.206658 |
| H | -6.839239 | -1.583308 | -1.631479 |
| H | 5.166862  | -5.059991 | 1.344975  |

---

---

|   |           |           |           |
|---|-----------|-----------|-----------|
| C | 3.579548  | -4.681238 | 2.759693  |
| H | 1.904314  | -4.061124 | 3.979980  |
| C | 5.219443  | -1.019391 | -3.555501 |
| H | 6.625047  | -0.117415 | -2.185561 |
| H | 3.613532  | -1.923921 | -4.680998 |
| H | -2.625773 | 4.336204  | -0.391916 |
| C | -2.474755 | 5.401772  | 1.470588  |
| H | -1.165031 | 2.064460  | 2.987729  |
| C | -1.680310 | 4.123647  | 3.363142  |
| C | -3.150388 | 2.745316  | -3.534971 |
| H | -1.224704 | 2.524976  | -2.597112 |
| H | -4.632499 | 1.431562  | -0.205017 |
| C | -5.058998 | 2.120994  | -2.190085 |
| H | 0.965417  | 4.441103  | -0.116090 |
| C | 1.214600  | 5.413476  | 1.785967  |
| C | 1.905899  | 3.994588  | 3.620827  |
| H | 2.136644  | 1.902441  | 3.169959  |
| H | 1.747793  | 1.125207  | -2.659225 |
| C | 3.491416  | 2.150354  | -3.393449 |
| C | 4.745313  | 3.416545  | -1.759294 |
| H | 3.965965  | 3.398460  | 0.247320  |
| H | -3.195671 | -5.741274 | 3.615940  |
| H | -6.130916 | -1.285789 | -3.997805 |
| H | 3.857183  | -5.505676 | 3.412776  |
| H | 5.896594  | -0.971311 | -4.405227 |
| H | -2.834428 | 6.335299  | 1.043767  |
| C | -2.143612 | 5.327760  | 2.825932  |
| H | -1.406939 | 4.060014  | 4.413066  |
| H | -2.732221 | 3.117596  | -4.467160 |
| C | -4.531440 | 2.595160  | -3.394782 |
| H | -6.132017 | 1.994526  | -2.074212 |
| C | 1.560656  | 5.255624  | 3.132578  |
| H | 0.924030  | 6.389033  | 1.405410  |

---

|   |           |          |           |
|---|-----------|----------|-----------|
| H | 2.153870  | 3.861837 | 4.670864  |
| H | 3.363170  | 1.784550 | -4.408660 |
| C | 4.575662  | 2.970418 | -3.073470 |
| H | 5.587158  | 4.055107 | -1.502061 |
| H | -2.241350 | 6.206685 | 3.459244  |
| H | -5.194788 | 2.843160 | -4.219962 |
| H | 1.545736  | 6.113695 | 3.800557  |
| H | 5.288818  | 3.257070 | -3.842817 |
| H | 0.003539  | 1.259922 | -1.665181 |

**6b**

| Atomic center | X         | Y         | Z         |
|---------------|-----------|-----------|-----------|
| Ir            | 0.387021  | -1.251939 | 0.244220  |
| P             | 2.532371  | -0.551963 | -0.242585 |
| Cl            | -0.102935 | 0.193110  | -3.107148 |
| P             | -1.811682 | -1.858684 | -0.042953 |
| C             | -0.301773 | 0.926915  | 0.288616  |
| C             | 0.923749  | -3.002847 | 0.473659  |
| C             | 2.334539  | 1.101445  | -1.073983 |
| C             | 3.378544  | -1.587413 | -1.477062 |
| C             | 3.717523  | -0.347927 | 1.122424  |
| C             | -2.034593 | -3.296845 | -1.131889 |
| C             | -2.858147 | -2.141928 | 1.415551  |
| C             | -2.581153 | -0.470149 | -1.007824 |
| P             | 1.067287  | 2.026247  | -0.154305 |
| P             | -2.010539 | 1.110766  | -0.310141 |
| O             | 1.255168  | -4.096120 | 0.676473  |
| H             | 3.255537  | 1.688967  | -1.145022 |
| H             | 1.919455  | 0.875509  | -2.068541 |
| C             | 4.747615  | -1.883265 | -1.395143 |
| C             | 2.602787  | -2.118715 | -2.520778 |
| C             | 3.576454  | -1.207818 | 2.222564  |
| C             | 4.768817  | 0.578728  | 1.099962  |
| C             | -2.739478 | -4.438782 | -0.728157 |

---

|   |           |           |           |
|---|-----------|-----------|-----------|
| C | -1.397804 | -3.261922 | -2.384565 |
| C | -4.257304 | -2.053548 | 1.375397  |
| C | -2.216452 | -2.474022 | 2.617834  |
| H | -3.675261 | -0.497703 | -1.029829 |
| H | -2.153777 | -0.549148 | -2.016267 |
| C | 0.698927  | 3.567004  | -1.020972 |
| C | 1.885733  | 2.460141  | 1.412322  |
| C | -2.458492 | 2.453879  | -1.427890 |
| C | -3.051181 | 1.332836  | 1.175426  |
| H | 5.348431  | -1.489403 | -0.580925 |
| C | 5.337753  | -2.704865 | -2.358880 |
| H | 1.544851  | -1.881039 | -2.578667 |
| C | 3.203302  | -2.930359 | -3.482505 |
| H | 2.749085  | -1.912358 | 2.246021  |
| C | 4.481006  | -1.145546 | 3.283087  |
| H | 4.895325  | 1.246830  | 0.252754  |
| C | 5.662517  | 0.651080  | 2.169878  |
| C | -2.811691 | -5.544358 | -1.580782 |
| H | -3.223007 | -4.470547 | 0.243826  |
| H | -0.841449 | -2.377383 | -2.689851 |
| C | -1.485282 | -4.366070 | -3.231277 |
| H | -4.765580 | -1.808277 | 0.446524  |
| C | -5.005126 | -2.278891 | 2.531263  |
| C | -2.967902 | -2.714817 | 3.769759  |
| H | -1.129890 | -2.525252 | 2.640700  |
| C | 0.464256  | 4.747837  | -0.294277 |
| C | 0.643677  | 3.578417  | -2.424433 |
| C | 1.747590  | 1.660308  | 2.557504  |
| C | 2.802689  | 3.525405  | 1.421558  |
| C | -2.589085 | 3.750354  | -0.902422 |
| C | -2.747903 | 2.208966  | -2.778609 |
| C | -2.655225 | 0.860057  | 2.436610  |
| C | -4.344366 | 1.859938  | 1.015403  |

---

---

|   |           |           |           |
|---|-----------|-----------|-----------|
| C | 4.568248  | -3.226906 | -3.402318 |
| H | 6.396905  | -2.939288 | -2.290102 |
| H | 2.602527  | -3.334524 | -4.293164 |
| H | 4.369998  | -1.819849 | 4.128419  |
| C | 5.522652  | -0.213128 | 3.259987  |
| H | 6.470175  | 1.378179  | 2.149924  |
| H | -3.354718 | -6.431709 | -1.265931 |
| C | -2.188060 | -5.508667 | -2.830398 |
| H | -0.999861 | -4.335859 | -4.203450 |
| C | -4.361322 | -2.611255 | 3.728384  |
| H | -6.088573 | -2.199526 | 2.498476  |
| H | -2.467366 | -2.978406 | 4.698041  |
| H | 0.496086  | 4.740811  | 0.790897  |
| C | 0.209159  | 5.939290  | -0.970620 |
| H | 0.772642  | 2.657101  | -2.986493 |
| C | 0.374050  | 4.775708  | -3.088835 |
| C | 2.488090  | 1.948303  | 3.704507  |
| H | 1.112069  | 0.779916  | 2.546800  |
| H | 2.938450  | 4.138181  | 0.535415  |
| C | 3.537422  | 3.809457  | 2.571813  |
| H | -2.382675 | 3.940940  | 0.146433  |
| C | -3.004420 | 4.794250  | -1.725140 |
| C | -3.171296 | 3.260744  | -3.592888 |
| H | -2.608848 | 1.221343  | -3.200969 |
| H | -1.690460 | 0.385833  | 2.579390  |
| C | -3.527021 | 0.940214  | 3.522882  |
| C | -5.213209 | 1.935407  | 2.104507  |
| H | -4.670550 | 2.221674  | 0.044989  |
| H | 5.030635  | -3.867627 | -4.149003 |
| H | 6.223553  | -0.158862 | 4.089070  |
| H | -2.246703 | -6.370253 | -3.490606 |
| H | -4.946902 | -2.790665 | 4.626489  |
| H | 0.041212  | 6.853031  | -0.406706 |

---



---

|   |           |          |           |
|---|-----------|----------|-----------|
| C | 0.168739  | 5.954961 | -2.368021 |
| H | 0.326287  | 4.782187 | -4.174157 |
| H | 2.383605  | 1.315004 | 4.580563  |
| C | 3.377204  | 3.024198 | 3.717066  |
| H | 4.237138  | 4.640840 | 2.570821  |
| C | -3.300734 | 4.549311 | -3.069905 |
| H | -3.098596 | 5.796165 | -1.316514 |
| H | -3.394165 | 3.068417 | -4.638665 |
| H | -3.210085 | 0.562012 | 4.490220  |
| C | -4.804244 | 1.480753 | 3.361253  |
| H | -6.207582 | 2.352457 | 1.969569  |
| H | -0.028987 | 6.885443 | -2.894040 |
| H | 3.954360  | 3.242581 | 4.611561  |
| H | -3.631127 | 5.364470 | -3.708682 |
| H | -5.481426 | 1.540950 | 4.209152  |
| H | -0.423050 | 1.173587 | 1.348210  |

---

## References

- [1] M. M. T. Khan, E. R. Rao, *Polyhedron* **1987**, *6*, 1727–1735.
- [2] S. Grimme, *J. Comput. Chem.* **2006**, *27*, 1787–1799.
- [3] F. Weigend, R. Ahlrichs, K. A. Peterson, T. H. Dunning, R. M. Pitzer, A. Bergner, *Phys. Chem. Chem. Phys.* **2005**, *7*, 3297.
- [4] F. Weigend, C. Hättig, H. Patzelt, R. Ahlrichs, S. Spencer, A. Willets, *Phys. Chem. Chem. Phys.* **2006**, *8*, 1057.
- [5] M. J. Frisch, G. W. Trucks, H. B. Schlegel, G. E. Scuseria, M. A. Robb, J. R. Cheeseman, G. Scalmani, V. Barone, G. A. Petersson, H. Nakatsuji, et al., **2016**.
- [6] A. V. Marenich, S. V. Jerome, C. J. Cramer, D. G. Truhlar, *J. Chem. Theory Comput.* **2012**, *8*, 527–541.
- [7] E. D. Glendening, J. K. Badenhoop, A. E. Reed, J. E. Carpenter, J. A. Bohmann, C. M. Morales, C. R. Landis, F. Weinhold, **2013**.
- [8] T. Lu, F. Chen, *J. Comput. Chem.* **2012**, *33*, 580–592.
- [9] *NBO 6.0*. E. D. Glendening, J. K. Badenhoop, A. E. Reed, J. E. Carpenter, J. A. Bohmann, C. M. Morales, C. R. Landis, and F. Weinhold, Theoretical Chemistry Institute, University of Wisconsin, Madison, **2013**.
- [10] *Gaussian 16*, Revision A.03, M. J. Frisch, G. W. Trucks, H. B. Schlegel, G. E. Scuseria, M. A. Robb, J. R. Cheeseman, G. Scalmani, V. Barone, G. A. Petersson, H. Nakatsuji, X. Li, M. Caricato, A. V. Marenich, J. Bloino, B. G. Janesko, R. Gomperts, B. Mennucci, H. P. Hratchian, J. V. Ortiz, A. F. Izmaylov, J. L. Sonnenberg, D. Williams-Young, F. Ding, F. Lipparini, F. Egidi, J. Goings, B. Peng, A. Petrone, T. Henderson, D. Ranasinghe, V. G. Zakrzewski, J. Gao, N. Rega, G. Zheng, W. Liang, M. Hada, M. Ehara, K. Toyota, R. Fukuda, J. Hasegawa, M. Ishida, T. Nakajima, Y. Honda, O. Kitao, H. Nakai, T. Vreven, K. Throssell, J. A. Montgomery, Jr., J. E. Peralta, F. Ogliaro, M. J. Bearpark, J. J. Heyd, E. N. Brothers, K. N. Kudin, V. N. Staroverov, T. A. Keith, R. Kobayashi, J. Normand, K. Raghavachari, A. P. Rendell, J. C. Burant, S. S. Iyengar, J. Tomasi, M. Cossi, J. M. Millam, M. Klene, C. Adamo, R. Cammi, J. W. Ochterski, R. L. Martin, K. Morokuma, O. Farkas, J. B. Foresman, D. J. Fox, *Gaussian, Inc.*, Wallingford CT, **2016**.
